# Supplementary material for: Pooled Surveillance Testing Program for Asymptomatic SARS-CoV-2 Infections in K-12 Schools and Universities
Source: bioRxiv or medRxiv preprint supplement (doi:10.1101/2021.02.09.21251464), 2021-02-12
Supplement: Supplementary file [file media-2.pdf]

Supplementary Table 2. Raw data of each K-12 organization tested between Aug 27, 2020 and Jan 13, 2021.

| K-12 NO. | Pool number | Pool size | Pool Positive number | Pool Positivity rate | Individual number | Individual Positive number | Individual Positivity rate | Date    |
|----------|-------------|-----------|----------------------|----------------------|-------------------|----------------------------|----------------------------|---------|
| R324851  | 8           | 24        | 0                    | 0.00%                | 192               | 0                          | 0.00%                      | 8/27/20 |
| R324833  | 75          | 23        | 1                    | 1.33%                | 1711              | 1                          | 0.06%                      | 8/28/20 |
| R324833  | 10          | 21        | 1                    | 10.00%               | 209               | 1                          | 0.48%                      | 8/29/20 |
| R324851  | 6           | 25        | 0                    | 0.00%                | 147               | 0                          | 0.00%                      | 8/29/20 |
| R324855  | 13          | 21        | 0                    | 0.00%                | 272               | 0                          | 0.00%                      | 9/2/20  |
| R324851  | 10          | 22        | 0                    | 0.00%                | 223               | 0                          | 0.00%                      | 9/2/20  |
| R326854  | 2           | 23        | 0                    | 0.00%                | 45                | 0                          | 0.00%                      | 9/3/20  |
| R324833  | 46          | 22        | 0                    | 0.00%                | 1026              | 0                          | 0.00%                      | 9/4/20  |
| R324851  | 1           | 11        | 0                    | 0.00%                | 11                | 0                          | 0.00%                      | 9/4/20  |
| R326854  | 3           | 19        | 0                    | 0.00%                | 56                | 0                          | 0.00%                      | 9/4/20  |
| R326820  | 3           | 18        | 0                    | 0.00%                | 53                | 0                          | 0.00%                      | 9/9/20  |
| R324851  | 1           | 10        | 0                    | 0.00%                | 10                | 0                          | 0.00%                      | 9/9/20  |
| R324836  | 49          | 22        | 0                    | 0.00%                | 1095              | 0                          | 0.00%                      | 9/10/20 |
| R324833  | 47          | 23        | 0                    | 0.00%                | 1070              | 0                          | 0.00%                      | 9/11/20 |
| R325241  | 4           | 23        | 0                    | 0.00%                | 93                | 0                          | 0.00%                      | 9/16/20 |
| R324836  | 50          | 23        | 0                    | 0.00%                | 1145              | 0                          | 0.00%                      | 9/17/20 |
| R324833  | 48          | 23        | 0                    | 0.00%                | 1083              | 0                          | 0.00%                      | 9/18/20 |
| R325305  | 1           | 22        | 0                    | 0.00%                | 22                | 0                          | 0.00%                      | 9/18/20 |
| R324851  | 5           | 25        | 0                    | 0.00%                | 126               | 0                          | 0.00%                      | 9/18/20 |
| R326854  | 1           | 17        | 0                    | 0.00%                | 17                | 0                          | 0.00%                      | 9/18/20 |
| R325241  | 43          | 24        | 0                    | 0.00%                | 1030              | 0                          | 0.00%                      | 9/22/20 |
| R326820  | 4           | 24        | 0                    | 0.00%                | 96                | 0                          | 0.00%                      | 9/23/20 |
| R325249  | 3           | 23        | 0                    | 0.00%                | 69                | 0                          | 0.00%                      | 9/24/20 |
| R325260  | 2           | 20        | 0                    | 0.00%                | 40                | 0                          | 0.00%                      | 9/24/20 |
| R324836  | 54          | 21        | 0                    | 0.00%                | 1123              | 0                          | 0.00%                      | 9/24/20 |
| R324833  | 46          | 24        | 0                    | 0.00%                | 1108              | 0                          | 0.00%                      | 9/25/20 |
| R324851  | 6           | 24        | 0                    | 0.00%                | 142               | 0                          | 0.00%                      | 9/25/20 |
| R326854  | 2           | 19        | 0                    | 0.00%                | 37                | 0                          | 0.00%                      | 9/25/20 |
| R325249  | 2           | 20        | 0                    | 0.00%                | 40                | 0                          | 0.00%                      | 9/28/20 |
| R325241  | 45          | 23        | 0                    | 0.00%                | 1034              | 0                          | 0.00%                      | 9/29/20 |
| R325249  | 7           | 21        | 0                    | 0.00%                | 146               | 0                          | 0.00%                      | 10/1/20 |
| R324836  | 56          | 20        | 0                    | 0.00%                | 1141              | 0                          | 0.00%                      | 10/1/20 |
| R325249  | 8           | 16        | 0                    | 0.00%                | 129               | 0                          | 0.00%                      | 10/2/20 |
| R324833  | 46          | 24        | 0                    | 0.00%                | 1093              | 0                          | 0.00%                      | 10/2/20 |
| R325136  | 5           | 24        | 0                    | 0.00%                | 120               | 0                          | 0.00%                      | 10/2/20 |
| R324851  | 7           | 22        | 0                    | 0.00%                | 154               | 0                          | 0.00%                      | 10/2/20 |
| R326854  | 1           | 22        | 0                    | 0.00%                | 22                | 0                          | 0.00%                      | 10/2/20 |
| R325137  | 32          | 24        | 3                    | 9.38%                | 768               | 1                          | 0.13%                      | 10/3/20 |
| R326820  | 7           | 18        | 1                    | 14.29%               | 128               | 1                          | 0.78%                      | 10/6/20 |
| R325249  | 6           | 18        | 0                    | 0.00%                | 105               | 0                          | 0.00%                      | 10/6/20 |
| R325241  | 46          | 22        | 0                    | 0.00%                | 1025              | 0                          | 0.00%                      | 10/6/20 |
| R325136  | 2           | 24        | 0                    | 0.00%                | 48                | 0                          | 0.00%                      | 10/7/20 |
| R325139  | 1           | 23        | 0                    | 0.00%                | 23                | 0                          | 0.00%                      | 10/7/20 |
| R325305  | 60          | 24        | 2                    | 3.33%                | 1416              | 2                          | 0.14%                      | 10/8/20 |
| R325147  | 34          | 23        | 1                    | 2.94%                | 795               | 1                          | 0.13%                      | 10/8/20 |
| R326820  | 5           | 23        | 0                    | 0.00%                | 117               | 0                          | 0.00%                      | 10/8/20 |
| R325136  | 3           | 24        | 0                    | 0.00%                | 72                | 0                          | 0.00%                      | 10/8/20 |
| R324836  | 56          | 20        | 0                    | 0.00%                | 1110              | 0                          | 0.00%                      | 10/8/20 |
| R325125  | 3           | 24        | 0                    | 0.00%                | 72                | 0                          | 0.00%                      | 10/8/20 |
| R326820  | 2           | 26        | 0                    | 0.00%                | 51                | 0                          | 0.00%                      | 10/9/20 |
| R325249  | 12          | 23        | 0                    | 0.00%                | 280               | 0                          | 0.00%                      | 10/9/20 |
| R324833  | 53          | 21        | 0                    | 0.00%                | 1093              | 0                          | 0.00%                      | 10/9/20 |

|         |    |    |   |       |      |   |       |          |
|---------|----|----|---|-------|------|---|-------|----------|
| R325137 | 25 | 24 | 0 | 0.00% | 588  | 0 | 0.00% | 10/9/20  |
| R325148 | 6  | 23 | 0 | 0.00% | 139  | 0 | 0.00% | 10/9/20  |
| R324851 | 7  | 24 | 0 | 0.00% | 169  | 0 | 0.00% | 10/9/20  |
| R326854 | 4  | 22 | 0 | 0.00% | 89   | 0 | 0.00% | 10/9/20  |
| R325125 | 5  | 21 | 0 | 0.00% | 106  | 0 | 0.00% | 10/9/20  |
| R325134 | 4  | 23 | 0 | 0.00% | 91   | 0 | 0.00% | 10/13/20 |
| R325241 | 47 | 22 | 0 | 0.00% | 1033 | 0 | 0.00% | 10/13/20 |
| R325129 | 3  | 22 | 0 | 0.00% | 65   | 0 | 0.00% | 10/13/20 |
| R325137 | 1  | 18 | 0 | 0.00% | 18   | 0 | 0.00% | 10/13/20 |
| R325138 | 33 | 24 | 0 | 0.00% | 779  | 0 | 0.00% | 10/13/20 |
| R325134 | 11 | 24 | 0 | 0.00% | 261  | 0 | 0.00% | 10/14/20 |
| R325136 | 2  | 24 | 0 | 0.00% | 48   | 0 | 0.00% | 10/14/20 |
| R325145 | 2  | 22 | 0 | 0.00% | 43   | 0 | 0.00% | 10/14/20 |
| R325125 | 11 | 24 | 1 | 9.09% | 264  | 1 | 0.38% | 10/15/20 |
| R324836 | 56 | 20 | 1 | 1.79% | 1100 | 6 | 0.55% | 10/15/20 |
| R325155 | 9  | 17 | 0 | 0.00% | 156  | 0 | 0.00% | 10/15/20 |
| R325128 | 6  | 23 | 0 | 0.00% | 140  | 0 | 0.00% | 10/15/20 |
| R325755 | 4  | 23 | 0 | 0.00% | 91   | 0 | 0.00% | 10/15/20 |
| R325127 | 4  | 24 | 0 | 0.00% | 96   | 0 | 0.00% | 10/15/20 |
| R325151 | 12 | 24 | 0 | 0.00% | 285  | 0 | 0.00% | 10/15/20 |
| R325147 | 14 | 23 | 0 | 0.00% | 323  | 0 | 0.00% | 10/16/20 |
| R325249 | 14 | 24 | 0 | 0.00% | 329  | 0 | 0.00% | 10/16/20 |
| R324833 | 53 | 21 | 0 | 0.00% | 1098 | 0 | 0.00% | 10/16/20 |
| R342986 | 3  | 21 | 0 | 0.00% | 64   | 0 | 0.00% | 10/16/20 |
| R325129 | 3  | 24 | 0 | 0.00% | 72   | 0 | 0.00% | 10/16/20 |
| R325137 | 32 | 24 | 0 | 0.00% | 761  | 0 | 0.00% | 10/16/20 |
| R325305 | 65 | 22 | 0 | 0.00% | 1433 | 0 | 0.00% | 10/16/20 |
| R324851 | 8  | 23 | 0 | 0.00% | 185  | 0 | 0.00% | 10/16/20 |
| R326854 | 4  | 21 | 0 | 0.00% | 83   | 0 | 0.00% | 10/16/20 |
| R325125 | 20 | 24 | 0 | 0.00% | 480  | 0 | 0.00% | 10/16/20 |
| R325136 | 3  | 24 | 0 | 0.00% | 72   | 0 | 0.00% | 10/17/20 |
| R326820 | 13 | 24 | 0 | 0.00% | 316  | 0 | 0.00% | 10/19/20 |
| R325554 | 3  | 24 | 0 | 0.00% | 72   | 0 | 0.00% | 10/19/20 |
| R325249 | 9  | 22 | 0 | 0.00% | 200  | 0 | 0.00% | 10/19/20 |
| R334362 | 37 | 21 | 0 | 0.00% | 795  | 0 | 0.00% | 10/19/20 |
| R325755 | 1  | 12 | 0 | 0.00% | 12   | 0 | 0.00% | 10/19/20 |
| R324727 | 15 | 24 | 0 | 0.00% | 354  | 0 | 0.00% | 10/19/20 |
| R325127 | 4  | 19 | 0 | 0.00% | 76   | 0 | 0.00% | 10/19/20 |
| R326854 | 7  | 21 | 0 | 0.00% | 147  | 0 | 0.00% | 10/19/20 |
| R325134 | 10 | 22 | 0 | 0.00% | 224  | 0 | 0.00% | 10/20/20 |
| R325241 | 46 | 23 | 0 | 0.00% | 1038 | 0 | 0.00% | 10/20/20 |
| R325127 | 5  | 24 | 0 | 0.00% | 118  | 0 | 0.00% | 10/20/20 |
| R325138 | 25 | 23 | 0 | 0.00% | 585  | 0 | 0.00% | 10/20/20 |
| R339851 | 10 | 24 | 0 | 0.00% | 235  | 0 | 0.00% | 10/20/20 |
| R334327 | 5  | 24 | 0 | 0.00% | 120  | 0 | 0.00% | 10/20/20 |
| R325125 | 37 | 24 | 0 | 0.00% | 870  | 0 | 0.00% | 10/20/20 |
| R425408 | 16 | 23 | 0 | 0.00% | 363  | 0 | 0.00% | 10/20/20 |
| R325147 | 10 | 23 | 0 | 0.00% | 228  | 0 | 0.00% | 10/21/20 |
| R339853 | 9  | 25 | 0 | 0.00% | 223  | 0 | 0.00% | 10/21/20 |
| R324855 | 10 | 24 | 0 | 0.00% | 237  | 0 | 0.00% | 10/21/20 |
| R334335 | 5  | 16 | 0 | 0.00% | 81   | 0 | 0.00% | 10/21/20 |
| R325136 | 2  | 24 | 0 | 0.00% | 48   | 0 | 0.00% | 10/21/20 |
| R325127 | 5  | 21 | 0 | 0.00% | 104  | 0 | 0.00% | 10/21/20 |
| R325529 | 3  | 24 | 0 | 0.00% | 71   | 0 | 0.00% | 10/21/20 |
| R325125 | 10 | 24 | 0 | 0.00% | 240  | 0 | 0.00% | 10/21/20 |
| R334324 | 3  | 18 | 0 | 0.00% | 53   | 0 | 0.00% | 10/21/20 |
| R325155 | 8  | 24 | 0 | 0.00% | 192  | 0 | 0.00% | 10/22/20 |
| R325147 | 28 | 18 | 0 | 0.00% | 510  | 0 | 0.00% | 10/22/20 |

|         |    |    |   |        |      |   |       |          |
|---------|----|----|---|--------|------|---|-------|----------|
| R325134 | 6  | 23 | 0 | 0.00%  | 139  | 0 | 0.00% | 10/22/20 |
| R339853 | 7  | 21 | 0 | 0.00%  | 150  | 0 | 0.00% | 10/22/20 |
| R325249 | 15 | 23 | 0 | 0.00%  | 346  | 0 | 0.00% | 10/22/20 |
| R325128 | 11 | 24 | 0 | 0.00%  | 259  | 0 | 0.00% | 10/22/20 |
| R325755 | 6  | 24 | 0 | 0.00%  | 145  | 0 | 0.00% | 10/22/20 |
| R325136 | 3  | 24 | 0 | 0.00%  | 72   | 0 | 0.00% | 10/22/20 |
| R324836 | 56 | 20 | 0 | 0.00%  | 1113 | 0 | 0.00% | 10/22/20 |
| R325151 | 20 | 24 | 0 | 0.00%  | 480  | 0 | 0.00% | 10/22/20 |
| R325125 | 10 | 24 | 0 | 0.00%  | 240  | 0 | 0.00% | 10/22/20 |
| R325147 | 12 | 24 | 0 | 0.00%  | 287  | 0 | 0.00% | 10/23/20 |
| R339853 | 8  | 24 | 0 | 0.00%  | 194  | 0 | 0.00% | 10/23/20 |
| R324833 | 55 | 20 | 0 | 0.00%  | 1099 | 0 | 0.00% | 10/23/20 |
| R334362 | 1  | 7  | 0 | 0.00%  | 7    | 0 | 0.00% | 10/23/20 |
| R342986 | 5  | 19 | 0 | 0.00%  | 93   | 0 | 0.00% | 10/23/20 |
| R325129 | 4  | 23 | 0 | 0.00%  | 91   | 0 | 0.00% | 10/23/20 |
| R325137 | 25 | 23 | 0 | 0.00%  | 586  | 0 | 0.00% | 10/23/20 |
| R325305 | 58 | 25 | 0 | 0.00%  | 1423 | 0 | 0.00% | 10/23/20 |
| R324851 | 8  | 23 | 0 | 0.00%  | 187  | 0 | 0.00% | 10/23/20 |
| R326854 | 3  | 25 | 0 | 0.00%  | 75   | 0 | 0.00% | 10/23/20 |
| R325125 | 7  | 24 | 0 | 0.00%  | 167  | 0 | 0.00% | 10/23/20 |
| R339853 | 5  | 24 | 0 | 0.00%  | 121  | 0 | 0.00% | 10/26/20 |
| R325249 | 12 | 21 | 0 | 0.00%  | 249  | 0 | 0.00% | 10/26/20 |
| R324727 | 7  | 23 | 0 | 0.00%  | 162  | 0 | 0.00% | 10/26/20 |
| R325134 | 10 | 23 | 0 | 0.00%  | 225  | 0 | 0.00% | 10/27/20 |
| R325241 | 46 | 23 | 0 | 0.00%  | 1037 | 0 | 0.00% | 10/27/20 |
| R325127 | 7  | 22 | 0 | 0.00%  | 151  | 0 | 0.00% | 10/27/20 |
| R325138 | 33 | 24 | 0 | 0.00%  | 779  | 0 | 0.00% | 10/27/20 |
| R339851 | 38 | 23 | 0 | 0.00%  | 892  | 0 | 0.00% | 10/27/20 |
| R325125 | 40 | 24 | 0 | 0.00%  | 960  | 0 | 0.00% | 10/27/20 |
| R425408 | 30 | 24 | 0 | 0.00%  | 720  | 0 | 0.00% | 10/27/20 |
| R325147 | 15 | 22 | 0 | 0.00%  | 333  | 0 | 0.00% | 10/28/20 |
| R339853 | 4  | 24 | 0 | 0.00%  | 97   | 0 | 0.00% | 10/28/20 |
| R334335 | 5  | 18 | 0 | 0.00%  | 88   | 0 | 0.00% | 10/28/20 |
| R334362 | 36 | 21 | 0 | 0.00%  | 773  | 0 | 0.00% | 10/28/20 |
| R325129 | 5  | 22 | 0 | 0.00%  | 111  | 0 | 0.00% | 10/28/20 |
| R334342 | 4  | 23 | 0 | 0.00%  | 93   | 0 | 0.00% | 10/28/20 |
| R325148 | 6  | 21 | 0 | 0.00%  | 126  | 0 | 0.00% | 10/28/20 |
| R325529 | 7  | 22 | 0 | 0.00%  | 152  | 0 | 0.00% | 10/28/20 |
| R334327 | 5  | 23 | 0 | 0.00%  | 117  | 0 | 0.00% | 10/28/20 |
| R325125 | 32 | 24 | 0 | 0.00%  | 759  | 0 | 0.00% | 10/28/20 |
| R334324 | 3  | 19 | 0 | 0.00%  | 56   | 0 | 0.00% | 10/28/20 |
| R325249 | 16 | 23 | 3 | 18.75% | 371  | 1 | 0.27% | 10/29/20 |
| R325305 | 59 | 24 | 2 | 3.39%  | 1417 | 1 | 0.07% | 10/29/20 |
| R325155 | 8  | 24 | 0 | 0.00%  | 188  | 0 | 0.00% | 10/29/20 |
| R325147 | 18 | 21 | 0 | 0.00%  | 386  | 0 | 0.00% | 10/29/20 |
| R325134 | 6  | 24 | 0 | 0.00%  | 142  | 0 | 0.00% | 10/29/20 |
| R325128 | 12 | 24 | 0 | 0.00%  | 292  | 0 | 0.00% | 10/29/20 |
| R325755 | 7  | 22 | 0 | 0.00%  | 156  | 0 | 0.00% | 10/29/20 |
| R325136 | 2  | 24 | 0 | 0.00%  | 48   | 0 | 0.00% | 10/29/20 |
| R342986 | 1  | 20 | 0 | 0.00%  | 20   | 0 | 0.00% | 10/29/20 |
| R324836 | 56 | 20 | 0 | 0.00%  | 1122 | 0 | 0.00% | 10/29/20 |
| R325145 | 2  | 24 | 0 | 0.00%  | 47   | 0 | 0.00% | 10/29/20 |
| R325151 | 20 | 24 | 0 | 0.00%  | 479  | 0 | 0.00% | 10/29/20 |
| R325125 | 7  | 24 | 0 | 0.00%  | 168  | 0 | 0.00% | 10/29/20 |
| R343828 | 12 | 19 | 2 | 16.67% | 230  | 9 | 3.91% | 10/30/20 |
| R325147 | 14 | 21 | 0 | 0.00%  | 287  | 0 | 0.00% | 10/30/20 |
| R339853 | 8  | 23 | 0 | 0.00%  | 184  | 0 | 0.00% | 10/30/20 |
| R343003 | 16 | 24 | 0 | 0.00%  | 378  | 0 | 0.00% | 10/30/20 |

|         |    |    |   |        |      |   |       |          |
|---------|----|----|---|--------|------|---|-------|----------|
| R324833 | 55 | 20 | 0 | 0.00%  | 1096 | 0 | 0.00% | 10/30/20 |
| R334362 | 1  | 13 | 0 | 0.00%  | 13   | 0 | 0.00% | 10/30/20 |
| R325136 | 5  | 22 | 0 | 0.00%  | 110  | 0 | 0.00% | 10/30/20 |
| R342986 | 6  | 21 | 0 | 0.00%  | 125  | 0 | 0.00% | 10/30/20 |
| R324727 | 1  | 26 | 0 | 0.00%  | 26   | 0 | 0.00% | 10/30/20 |
| R325137 | 32 | 24 | 0 | 0.00%  | 766  | 0 | 0.00% | 10/30/20 |
| R325529 | 3  | 18 | 0 | 0.00%  | 55   | 0 | 0.00% | 10/30/20 |
| R341834 | 4  | 24 | 0 | 0.00%  | 96   | 0 | 0.00% | 10/30/20 |
| R343828 | 7  | 17 | 0 | 0.00%  | 122  | 0 | 0.00% | 10/31/20 |
| R325127 | 22 | 23 | 1 | 4.55%  | 507  | 4 | 0.79% | 11/2/20  |
| R325134 | 5  | 22 | 0 | 0.00%  | 111  | 0 | 0.00% | 11/2/20  |
| R325249 | 11 | 24 | 0 | 0.00%  | 264  | 0 | 0.00% | 11/2/20  |
| R324727 | 9  | 24 | 0 | 0.00%  | 218  | 0 | 0.00% | 11/2/20  |
| R324851 | 43 | 24 | 0 | 0.00%  | 1033 | 0 | 0.00% | 11/2/20  |
| R325125 | 43 | 24 | 3 | 6.98%  | 1032 | 3 | 0.29% | 11/3/20  |
| R425408 | 51 | 24 | 2 | 3.92%  | 1212 | 1 | 0.08% | 11/3/20  |
| R325241 | 51 | 20 | 1 | 1.96%  | 1032 | 1 | 0.10% | 11/3/20  |
| R341827 | 5  | 18 | 0 | 0.00%  | 90   | 0 | 0.00% | 11/3/20  |
| R341823 | 1  | 11 | 0 | 0.00%  | 11   | 0 | 0.00% | 11/3/20  |
| R325134 | 9  | 24 | 0 | 0.00%  | 215  | 0 | 0.00% | 11/3/20  |
| R325127 | 12 | 22 | 0 | 0.00%  | 258  | 0 | 0.00% | 11/3/20  |
| R325139 | 17 | 20 | 0 | 0.00%  | 347  | 0 | 0.00% | 11/3/20  |
| R325138 | 34 | 23 | 0 | 0.00%  | 796  | 0 | 0.00% | 11/3/20  |
| R325529 | 4  | 24 | 0 | 0.00%  | 96   | 0 | 0.00% | 11/3/20  |
| R341057 | 28 | 18 | 0 | 0.00%  | 513  | 0 | 0.00% | 11/3/20  |
| R334327 | 5  | 23 | 4 | 80.00% | 115  | 6 | 5.22% | 11/4/20  |
| R334362 | 36 | 23 | 2 | 5.56%  | 820  | 2 | 0.24% | 11/4/20  |
| R425408 | 20 | 24 | 1 | 5.00%  | 480  | 2 | 0.42% | 11/4/20  |
| R341827 | 7  | 18 | 0 | 0.00%  | 123  | 0 | 0.00% | 11/4/20  |
| R325147 | 13 | 23 | 0 | 0.00%  | 304  | 0 | 0.00% | 11/4/20  |
| R426326 | 13 | 24 | 0 | 0.00%  | 317  | 0 | 0.00% | 11/4/20  |
| R339853 | 17 | 24 | 0 | 0.00%  | 400  | 0 | 0.00% | 11/4/20  |
| R325249 | 9  | 22 | 0 | 0.00%  | 195  | 0 | 0.00% | 11/4/20  |
| R334335 | 4  | 19 | 0 | 0.00%  | 75   | 0 | 0.00% | 11/4/20  |
| R325136 | 3  | 24 | 0 | 0.00%  | 71   | 0 | 0.00% | 11/4/20  |
| R426349 | 19 | 24 | 0 | 0.00%  | 449  | 0 | 0.00% | 11/4/20  |
| R325139 | 14 | 24 | 0 | 0.00%  | 332  | 0 | 0.00% | 11/4/20  |
| R334342 | 4  | 24 | 0 | 0.00%  | 96   | 0 | 0.00% | 11/4/20  |
| R343002 | 13 | 21 | 0 | 0.00%  | 272  | 0 | 0.00% | 11/4/20  |
| R325125 | 29 | 24 | 0 | 0.00%  | 696  | 0 | 0.00% | 11/4/20  |
| R334324 | 3  | 19 | 0 | 0.00%  | 57   | 0 | 0.00% | 11/4/20  |
| R339851 | 30 | 23 | 4 | 13.33% | 690  | 4 | 0.58% | 11/5/20  |
| R325305 | 59 | 24 | 3 | 5.08%  | 1406 | 5 | 0.36% | 11/5/20  |
| R334327 | 3  | 19 | 2 | 66.67% | 57   | 2 | 3.51% | 11/5/20  |
| R325129 | 7  | 22 | 1 | 14.29% | 156  | 1 | 0.64% | 11/5/20  |
| R324833 | 55 | 20 | 1 | 1.82%  | 1095 | 1 | 0.09% | 11/5/20  |
| R341827 | 5  | 20 | 0 | 0.00%  | 99   | 0 | 0.00% | 11/5/20  |
| R325155 | 6  | 24 | 0 | 0.00%  | 144  | 0 | 0.00% | 11/5/20  |
| R325147 | 18 | 23 | 0 | 0.00%  | 412  | 0 | 0.00% | 11/5/20  |
| R326820 | 7  | 24 | 0 | 0.00%  | 166  | 0 | 0.00% | 11/5/20  |
| R325134 | 10 | 24 | 0 | 0.00%  | 240  | 0 | 0.00% | 11/5/20  |
| R339422 | 4  | 22 | 0 | 0.00%  | 86   | 0 | 0.00% | 11/5/20  |
| R325128 | 16 | 23 | 0 | 0.00%  | 366  | 0 | 0.00% | 11/5/20  |
| R325755 | 7  | 22 | 0 | 0.00%  | 156  | 0 | 0.00% | 11/5/20  |
| R342986 | 2  | 24 | 0 | 0.00%  | 48   | 0 | 0.00% | 11/5/20  |
| R325139 | 9  | 23 | 0 | 0.00%  | 205  | 0 | 0.00% | 11/5/20  |
| R324836 | 50 | 23 | 0 | 0.00%  | 1128 | 0 | 0.00% | 11/5/20  |
| R325145 | 3  | 24 | 0 | 0.00%  | 71   | 0 | 0.00% | 11/5/20  |

|         |    |    |    |         |      |    |       |          |
|---------|----|----|----|---------|------|----|-------|----------|
| R325151 | 21 | 23 | 0  | 0.00%   | 479  | 0  | 0.00% | 11/5/20  |
| R341834 | 2  | 24 | 0  | 0.00%   | 47   | 0  | 0.00% | 11/5/20  |
| R325125 | 8  | 23 | 0  | 0.00%   | 185  | 0  | 0.00% | 11/5/20  |
| R341826 | 18 | 21 | 0  | 0.00%   | 380  | 0  | 0.00% | 11/5/20  |
| R425408 | 38 | 24 | 0  | 0.00%   | 918  | 0  | 0.00% | 11/5/20  |
| R342986 | 6  | 22 | 1  | 16.67%  | 130  | 1  | 0.77% | 11/6/20  |
| R325147 | 13 | 22 | 0  | 0.00%   | 286  | 0  | 0.00% | 11/6/20  |
| R326820 | 7  | 20 | 0  | 0.00%   | 137  | 0  | 0.00% | 11/6/20  |
| R426326 | 15 | 23 | 0  | 0.00%   | 338  | 0  | 0.00% | 11/6/20  |
| R325249 | 8  | 24 | 0  | 0.00%   | 190  | 0  | 0.00% | 11/6/20  |
| R343003 | 19 | 22 | 0  | 0.00%   | 412  | 0  | 0.00% | 11/6/20  |
| R334362 | 1  | 8  | 0  | 0.00%   | 8    | 0  | 0.00% | 11/6/20  |
| R325136 | 2  | 24 | 0  | 0.00%   | 48   | 0  | 0.00% | 11/6/20  |
| R325544 | 2  | 13 | 0  | 0.00%   | 26   | 0  | 0.00% | 11/6/20  |
| R325137 | 10 | 24 | 0  | 0.00%   | 240  | 0  | 0.00% | 11/6/20  |
| R325570 | 1  | 18 | 0  | 0.00%   | 18   | 0  | 0.00% | 11/6/20  |
| R325529 | 12 | 23 | 0  | 0.00%   | 276  | 0  | 0.00% | 11/6/20  |
| R324851 | 4  | 22 | 0  | 0.00%   | 88   | 0  | 0.00% | 11/6/20  |
| R326854 | 1  | 26 | 0  | 0.00%   | 26   | 0  | 0.00% | 11/6/20  |
| R325125 | 6  | 23 | 0  | 0.00%   | 140  | 0  | 0.00% | 11/6/20  |
| R325137 | 16 | 23 | 0  | 0.00%   | 366  | 0  | 0.00% | 11/7/20  |
| R334327 | 2  | 22 | 0  | 0.00%   | 44   | 0  | 0.00% | 11/7/20  |
| R325127 | 27 | 22 | 4  | 14.81%  | 592  | 4  | 0.68% | 11/9/20  |
| R325129 | 2  | 14 | 2  | 100.00% | 28   | 2  | 7.14% | 11/9/20  |
| R325249 | 7  | 22 | 0  | 0.00%   | 157  | 0  | 0.00% | 11/9/20  |
| R342986 | 6  | 21 | 0  | 0.00%   | 128  | 0  | 0.00% | 11/9/20  |
| R325148 | 6  | 23 | 0  | 0.00%   | 137  | 0  | 0.00% | 11/9/20  |
| R334327 | 4  | 24 | 0  | 0.00%   | 96   | 0  | 0.00% | 11/9/20  |
| R425408 | 64 | 24 | 10 | 15.63%  | 1533 | 11 | 0.72% | 11/10/20 |
| R339851 | 45 | 23 | 4  | 8.89%   | 1055 | 4  | 0.38% | 11/10/20 |
| R325241 | 58 | 17 | 4  | 6.90%   | 989  | 1  | 0.10% | 11/10/20 |
| R325125 | 38 | 24 | 1  | 2.63%   | 912  | 2  | 0.22% | 11/10/20 |
| R341849 | 1  | 24 | 0  | 0.00%   | 24   | 0  | 0.00% | 11/10/20 |
| R341827 | 6  | 18 | 0  | 0.00%   | 105  | 0  | 0.00% | 11/10/20 |
| R341823 | 1  | 10 | 0  | 0.00%   | 10   | 0  | 0.00% | 11/10/20 |
| R325134 | 5  | 24 | 0  | 0.00%   | 120  | 0  | 0.00% | 11/10/20 |
| R343828 | 7  | 24 | 0  | 0.00%   | 165  | 0  | 0.00% | 11/10/20 |
| R324727 | 8  | 22 | 0  | 0.00%   | 178  | 0  | 0.00% | 11/10/20 |
| R325127 | 17 | 22 | 0  | 0.00%   | 371  | 0  | 0.00% | 11/10/20 |
| R426349 | 17 | 23 | 0  | 0.00%   | 398  | 0  | 0.00% | 11/10/20 |
| R325138 | 33 | 24 | 0  | 0.00%   | 778  | 0  | 0.00% | 11/10/20 |
| R325529 | 4  | 24 | 0  | 0.00%   | 96   | 0  | 0.00% | 11/10/20 |
| R341057 | 27 | 20 | 0  | 0.00%   | 528  | 0  | 0.00% | 11/10/20 |
| R325129 | 5  | 23 | 2  | 40.00%  | 113  | 2  | 1.77% | 11/11/20 |
| R339853 | 12 | 24 | 2  | 16.67%  | 292  | 2  | 0.68% | 11/11/20 |
| R325249 | 13 | 23 | 2  | 15.38%  | 295  | 2  | 0.68% | 11/11/20 |
| R341826 | 18 | 23 | 2  | 11.11%  | 414  | 2  | 0.48% | 11/11/20 |
| R334362 | 36 | 22 | 2  | 5.56%   | 803  | 2  | 0.25% | 11/11/20 |
| R325125 | 36 | 24 | 2  | 5.56%   | 864  | 3  | 0.35% | 11/11/20 |
| R425408 | 34 | 23 | 1  | 2.94%   | 798  | 1  | 0.13% | 11/11/20 |
| R341831 | 3  | 23 | 0  | 0.00%   | 70   | 0  | 0.00% | 11/11/20 |
| R325147 | 16 | 21 | 0  | 0.00%   | 339  | 0  | 0.00% | 11/11/20 |
| R339422 | 4  | 23 | 0  | 0.00%   | 90   | 0  | 0.00% | 11/11/20 |
| R426326 | 14 | 23 | 0  | 0.00%   | 327  | 0  | 0.00% | 11/11/20 |
| R341850 | 13 | 21 | 0  | 0.00%   | 272  | 0  | 0.00% | 11/11/20 |
| R341840 | 20 | 21 | 0  | 0.00%   | 416  | 0  | 0.00% | 11/11/20 |
| R325136 | 2  | 24 | 0  | 0.00%   | 48   | 0  | 0.00% | 11/11/20 |
| R334342 | 4  | 23 | 0  | 0.00%   | 90   | 0  | 0.00% | 11/11/20 |

|         |    |    |   |         |      |   |         |          |
|---------|----|----|---|---------|------|---|---------|----------|
| R325529 | 5  | 22 | 0 | 0.00%   | 108  | 0 | 0.00%   | 11/11/20 |
| R343002 | 12 | 23 | 0 | 0.00%   | 271  | 0 | 0.00%   | 11/11/20 |
| R324851 | 6  | 23 | 0 | 0.00%   | 135  | 0 | 0.00%   | 11/11/20 |
| R326854 | 1  | 22 | 0 | 0.00%   | 22   | 0 | 0.00%   | 11/11/20 |
| R341867 | 3  | 20 | 0 | 0.00%   | 61   | 0 | 0.00%   | 11/11/20 |
| R334324 | 3  | 19 | 0 | 0.00%   | 57   | 0 | 0.00%   | 11/11/20 |
| R325139 | 16 | 22 | 5 | 31.25%  | 349  | 7 | 2.01%   | 11/12/20 |
| R325139 | 30 | 22 | 5 | 31.25%  | 674  | 7 | 1.04%   | 11/12/20 |
| R325139 | 30 | 12 | 5 | 16.67%  | 349  | 7 | 2.01%   | 11/12/20 |
| R325139 | 30 | 22 | 5 | 16.67%  | 674  | 7 | 1.04%   | 11/12/20 |
| R341834 | 2  | 24 | 2 | 100.00% | 48   | 2 | 4.17%   | 11/12/20 |
| R324836 | 56 | 18 | 2 | 3.57%   | 1011 | 2 | 0.20%   | 11/12/20 |
| R325125 | 7  | 24 | 1 | 14.29%  | 168  | 1 | 0.60%   | 11/12/20 |
| R325155 | 7  | 24 | 0 | 0.00%   | 168  | 0 | 0.00%   | 11/12/20 |
| R325147 | 18 | 22 | 0 | 0.00%   | 391  | 0 | 0.00%   | 11/12/20 |
| R325554 | 4  | 23 | 0 | 0.00%   | 91   | 0 | 0.00%   | 11/12/20 |
| R325134 | 11 | 24 | 0 | 0.00%   | 264  | 0 | 0.00%   | 11/12/20 |
| R325128 | 16 | 23 | 0 | 0.00%   | 363  | 0 | 0.00%   | 11/12/20 |
| R325755 | 6  | 26 | 0 | 0.00%   | 153  | 0 | 0.00%   | 11/12/20 |
| R342986 | 4  | 24 | 0 | 0.00%   | 96   | 0 | 0.00%   | 11/12/20 |
| R334327 | 2  | 24 | 0 | 0.00%   | 48   | 0 | 0.00%   | 11/12/20 |
| R325145 | 2  | 24 | 0 | 0.00%   | 47   | 0 | 0.00%   | 11/12/20 |
| R325151 | 20 | 24 | 0 | 0.00%   | 477  | 0 | 0.00%   | 11/12/20 |
| R325137 | 34 | 24 | 6 | 17.65%  | 811  | 6 | 0.74%   | 11/13/20 |
| R325305 | 61 | 23 | 6 | 9.84%   | 1387 | 7 | 0.50%   | 11/13/20 |
| R324833 | 55 | 20 | 4 | 7.27%   | 1088 | 5 | 0.46%   | 11/13/20 |
| R426326 | 14 | 23 | 3 | 21.43%  | 326  | 4 | 1.23%   | 11/13/20 |
| R343003 | 17 | 23 | 2 | 11.76%  | 391  | 2 | 0.51%   | 11/13/20 |
| R325147 | 12 | 23 | 0 | 0.00%   | 273  | 0 | 0.00%   | 11/13/20 |
| R325249 | 8  | 23 | 0 | 0.00%   | 182  | 0 | 0.00%   | 11/13/20 |
| R334362 | 1  | 9  | 0 | 0.00%   | 9    | 0 | 0.00%   | 11/13/20 |
| R325136 | 3  | 24 | 0 | 0.00%   | 72   | 0 | 0.00%   | 11/13/20 |
| R342986 | 3  | 23 | 0 | 0.00%   | 69   | 0 | 0.00%   | 11/13/20 |
| R325544 | 2  | 14 | 0 | 0.00%   | 28   | 0 | 0.00%   | 11/13/20 |
| R325529 | 8  | 23 | 0 | 0.00%   | 183  | 0 | 0.00%   | 11/13/20 |
| R325125 | 8  | 24 | 0 | 0.00%   | 192  | 0 | 0.00%   | 11/13/20 |
| R325127 | 28 | 22 | 1 | 3.57%   | 608  | 1 | 0.16%   | 11/16/20 |
| R325249 | 8  | 24 | 0 | 0.00%   | 193  | 0 | 0.00%   | 11/16/20 |
| R324727 | 8  | 24 | 0 | 0.00%   | 190  | 0 | 0.00%   | 11/16/20 |
| R325529 | 4  | 24 | 0 | 0.00%   | 95   | 0 | 0.00%   | 11/16/20 |
| R324851 | 19 | 24 | 0 | 0.00%   | 450  | 0 | 0.00%   | 11/16/20 |
| R325125 | 5  | 22 | 0 | 0.00%   | 111  | 0 | 0.00%   | 11/16/20 |
| R325125 | 38 | 24 | 2 | 5.26%   | 903  | 2 | 0.22%   | 11/17/20 |
| R325241 | 58 | 17 | 2 | 3.45%   | 981  | 2 | 0.20%   | 11/17/20 |
| R426326 | 1  | 2  | 1 | 100.00% | 2    | 2 | 100.00% | 11/17/20 |
| R325139 | 18 | 23 | 1 | 5.56%   | 415  | 1 | 0.24%   | 11/17/20 |
| R425408 | 41 | 23 | 1 | 2.44%   | 963  | 2 | 0.21%   | 11/17/20 |
| R341827 | 5  | 17 | 0 | 0.00%   | 86   | 0 | 0.00%   | 11/17/20 |
| R341823 | 2  | 13 | 0 | 0.00%   | 26   | 0 | 0.00%   | 11/17/20 |
| R325134 | 11 | 23 | 0 | 0.00%   | 258  | 0 | 0.00%   | 11/17/20 |
| R339422 | 4  | 22 | 0 | 0.00%   | 87   | 0 | 0.00%   | 11/17/20 |
| R325755 | 3  | 23 | 0 | 0.00%   | 69   | 0 | 0.00%   | 11/17/20 |
| R325136 | 3  | 24 | 0 | 0.00%   | 72   | 0 | 0.00%   | 11/17/20 |
| R325127 | 18 | 21 | 0 | 0.00%   | 383  | 0 | 0.00%   | 11/17/20 |
| R325129 | 6  | 23 | 0 | 0.00%   | 140  | 0 | 0.00%   | 11/17/20 |
| R426349 | 19 | 23 | 0 | 0.00%   | 435  | 0 | 0.00%   | 11/17/20 |
| R325138 | 28 | 24 | 0 | 0.00%   | 670  | 0 | 0.00%   | 11/17/20 |
| R339851 | 23 | 23 | 0 | 0.00%   | 540  | 0 | 0.00%   | 11/17/20 |

|         |    |    |   |        |      |   |       |          |
|---------|----|----|---|--------|------|---|-------|----------|
| R334327 | 2  | 23 | 0 | 0.00%  | 46   | 0 | 0.00% | 11/17/20 |
| R325129 | 5  | 20 | 2 | 40.00% | 101  | 2 | 1.98% | 11/18/20 |
| R426326 | 8  | 22 | 1 | 12.50% | 177  | 0 | 0.00% | 11/18/20 |
| R341827 | 10 | 20 | 1 | 10.00% | 195  | 1 | 0.51% | 11/18/20 |
| R341850 | 13 | 21 | 1 | 7.69%  | 272  | 1 | 0.37% | 11/18/20 |
| R339853 | 17 | 22 | 1 | 5.88%  | 379  | 1 | 0.26% | 11/18/20 |
| R325249 | 17 | 23 | 1 | 5.88%  | 386  | 1 | 0.26% | 11/18/20 |
| R325125 | 37 | 24 | 1 | 2.70%  | 888  | 1 | 0.11% | 11/18/20 |
| R325147 | 17 | 21 | 0 | 0.00%  | 361  | 0 | 0.00% | 11/18/20 |
| R343828 | 8  | 20 | 0 | 0.00%  | 161  | 0 | 0.00% | 11/18/20 |
| R339308 | 2  | 22 | 0 | 0.00%  | 44   | 0 | 0.00% | 11/18/20 |
| R341840 | 20 | 21 | 0 | 0.00%  | 429  | 0 | 0.00% | 11/18/20 |
| R334362 | 36 | 22 | 0 | 0.00%  | 800  | 0 | 0.00% | 11/18/20 |
| R334342 | 4  | 24 | 0 | 0.00%  | 96   | 0 | 0.00% | 11/18/20 |
| R325148 | 6  | 23 | 0 | 0.00%  | 138  | 0 | 0.00% | 11/18/20 |
| R325529 | 9  | 24 | 0 | 0.00%  | 216  | 0 | 0.00% | 11/18/20 |
| R325145 | 3  | 21 | 0 | 0.00%  | 63   | 0 | 0.00% | 11/18/20 |
| R343002 | 12 | 22 | 0 | 0.00%  | 264  | 0 | 0.00% | 11/18/20 |
| R341825 | 5  | 16 | 0 | 0.00%  | 79   | 0 | 0.00% | 11/18/20 |
| R341834 | 2  | 20 | 0 | 0.00%  | 39   | 0 | 0.00% | 11/18/20 |
| R341057 | 21 | 23 | 0 | 0.00%  | 481  | 0 | 0.00% | 11/18/20 |
| R324851 | 45 | 24 | 0 | 0.00%  | 1058 | 0 | 0.00% | 11/18/20 |
| R341867 | 3  | 23 | 0 | 0.00%  | 68   | 0 | 0.00% | 11/18/20 |
| R425408 | 17 | 23 | 0 | 0.00%  | 390  | 0 | 0.00% | 11/18/20 |
| R334324 | 3  | 18 | 0 | 0.00%  | 54   | 0 | 0.00% | 11/18/20 |
| R324836 | 45 | 23 | 2 | 4.44%  | 1013 | 1 | 0.10% | 11/19/20 |
| R334335 | 3  | 23 | 1 | 33.33% | 70   | 1 | 1.43% | 11/19/20 |
| R325305 | 40 | 22 | 1 | 2.50%  | 874  | 3 | 0.34% | 11/19/20 |
| R341827 | 7  | 19 | 0 | 0.00%  | 131  | 0 | 0.00% | 11/19/20 |
| R325155 | 13 | 23 | 0 | 0.00%  | 300  | 0 | 0.00% | 11/19/20 |
| R325147 | 16 | 22 | 0 | 0.00%  | 357  | 0 | 0.00% | 11/19/20 |
| R325134 | 11 | 22 | 0 | 0.00%  | 242  | 0 | 0.00% | 11/19/20 |
| R325128 | 16 | 23 | 0 | 0.00%  | 367  | 0 | 0.00% | 11/19/20 |
| R325755 | 5  | 22 | 0 | 0.00%  | 111  | 0 | 0.00% | 11/19/20 |
| R325136 | 2  | 20 | 0 | 0.00%  | 39   | 0 | 0.00% | 11/19/20 |
| R342986 | 8  | 22 | 0 | 0.00%  | 174  | 0 | 0.00% | 11/19/20 |
| R339301 | 7  | 19 | 0 | 0.00%  | 132  | 0 | 0.00% | 11/19/20 |
| R325125 | 2  | 24 | 0 | 0.00%  | 48   | 0 | 0.00% | 11/19/20 |
| R325137 | 33 | 24 | 4 | 12.12% | 791  | 5 | 0.63% | 11/20/20 |
| R426326 | 7  | 21 | 1 | 14.29% | 145  | 2 | 1.38% | 11/20/20 |
| R325249 | 11 | 22 | 1 | 9.09%  | 241  | 1 | 0.41% | 11/20/20 |
| R325125 | 11 | 24 | 1 | 9.09%  | 260  | 1 | 0.38% | 11/20/20 |
| R325147 | 13 | 23 | 1 | 7.69%  | 298  | 1 | 0.34% | 11/20/20 |
| R341866 | 29 | 24 | 1 | 3.45%  | 690  | 2 | 0.29% | 11/20/20 |
| R341858 | 31 | 24 | 1 | 3.23%  | 743  | 1 | 0.13% | 11/20/20 |
| R343003 | 17 | 23 | 0 | 0.00%  | 386  | 0 | 0.00% | 11/20/20 |
| R324833 | 55 | 19 | 0 | 0.00%  | 1068 | 0 | 0.00% | 11/20/20 |
| R343386 | 2  | 24 | 0 | 0.00%  | 48   | 0 | 0.00% | 11/20/20 |
| R325544 | 2  | 14 | 0 | 0.00%  | 28   | 0 | 0.00% | 11/20/20 |
| R326854 | 1  | 22 | 0 | 0.00%  | 22   | 0 | 0.00% | 11/20/20 |
| R339851 | 21 | 24 | 1 | 4.76%  | 497  | 1 | 0.20% | 11/23/20 |
| R325249 | 10 | 23 | 0 | 0.00%  | 225  | 0 | 0.00% | 11/23/20 |
| R334324 | 3  | 17 | 0 | 0.00%  | 50   | 0 | 0.00% | 11/23/20 |
| R325134 | 5  | 22 | 1 | 20.00% | 108  | 1 | 0.93% | 11/24/20 |
| R324855 | 2  | 15 | 0 | 0.00%  | 29   | 0 | 0.00% | 11/24/20 |
| R325129 | 7  | 22 | 0 | 0.00%  | 157  | 0 | 0.00% | 11/24/20 |
| R339483 | 8  | 20 | 0 | 0.00%  | 156  | 0 | 0.00% | 11/24/20 |
| R426349 | 12 | 24 | 0 | 0.00%  | 282  | 0 | 0.00% | 11/24/20 |

|         |    |    |    |        |      |    |       |          |
|---------|----|----|----|--------|------|----|-------|----------|
| R325125 | 16 | 24 | 0  | 0.00%  | 377  | 0  | 0.00% | 11/24/20 |
| R425408 | 40 | 24 | 0  | 0.00%  | 946  | 0  | 0.00% | 11/24/20 |
| R325249 | 3  | 22 | 1  | 33.33% | 66   | 1  | 1.52% | 11/25/20 |
| R425408 | 18 | 23 | 1  | 5.56%  | 416  | 1  | 0.24% | 11/25/20 |
| R342167 | 1  | 19 | 0  | 0.00%  | 19   | 0  | 0.00% | 11/25/20 |
| R334335 | 3  | 19 | 0  | 0.00%  | 58   | 0  | 0.00% | 11/25/20 |
| R339308 | 2  | 24 | 0  | 0.00%  | 48   | 0  | 0.00% | 11/25/20 |
| R325137 | 4  | 22 | 0  | 0.00%  | 87   | 0  | 0.00% | 11/25/20 |
| R339492 | 4  | 16 | 0  | 0.00%  | 62   | 0  | 0.00% | 11/25/20 |
| R324833 | 7  | 20 | 0  | 0.00%  | 140  | 0  | 0.00% | 11/27/20 |
| R426787 | 35 | 22 | 4  | 11.43% | 769  | 4  | 0.52% | 11/30/20 |
| R325241 | 42 | 23 | 3  | 7.14%  | 968  | 3  | 0.31% | 11/30/20 |
| R425408 | 52 | 23 | 2  | 3.85%  | 1196 | 4  | 0.33% | 11/30/20 |
| R426665 | 8  | 22 | 1  | 12.50% | 174  | 1  | 0.57% | 11/30/20 |
| R325249 | 14 | 22 | 1  | 7.14%  | 308  | 1  | 0.32% | 11/30/20 |
| R325127 | 44 | 23 | 1  | 2.27%  | 1029 | 1  | 0.10% | 11/30/20 |
| R326820 | 14 | 23 | 0  | 0.00%  | 325  | 0  | 0.00% | 11/30/20 |
| R341858 | 30 | 24 | 0  | 0.00%  | 720  | 0  | 0.00% | 11/30/20 |
| R334342 | 18 | 24 | 0  | 0.00%  | 427  | 0  | 0.00% | 11/30/20 |
| R341057 | 15 | 22 | 0  | 0.00%  | 329  | 0  | 0.00% | 11/30/20 |
| R325125 | 92 | 24 | 14 | 15.22% | 2202 | 19 | 0.86% | 12/1/20  |
| R343003 | 11 | 23 | 2  | 18.18% | 251  | 2  | 0.80% | 12/1/20  |
| R325127 | 2  | 15 | 1  | 50.00% | 30   | 1  | 3.33% | 12/1/20  |
| R325129 | 6  | 23 | 1  | 16.67% | 135  | 1  | 0.74% | 12/1/20  |
| R383214 | 21 | 22 | 1  | 4.76%  | 468  | 1  | 0.21% | 12/1/20  |
| R341827 | 36 | 20 | 1  | 2.78%  | 711  | 1  | 0.14% | 12/1/20  |
| R325147 | 4  | 21 | 0  | 0.00%  | 83   | 0  | 0.00% | 12/1/20  |
| R383220 | 5  | 13 | 0  | 0.00%  | 67   | 0  | 0.00% | 12/1/20  |
| R325134 | 9  | 23 | 0  | 0.00%  | 207  | 0  | 0.00% | 12/1/20  |
| R339422 | 4  | 21 | 0  | 0.00%  | 83   | 0  | 0.00% | 12/1/20  |
| R383226 | 3  | 12 | 0  | 0.00%  | 35   | 0  | 0.00% | 12/1/20  |
| R334327 | 4  | 21 | 0  | 0.00%  | 84   | 0  | 0.00% | 12/1/20  |
| R341057 | 11 | 21 | 0  | 0.00%  | 229  | 0  | 0.00% | 12/1/20  |
| R382253 | 30 | 24 | 3  | 10.00% | 710  | 2  | 0.28% | 12/2/20  |
| R341866 | 28 | 24 | 2  | 7.14%  | 664  | 2  | 0.30% | 12/2/20  |
| R325129 | 5  | 21 | 1  | 20.00% | 103  | 2  | 1.94% | 12/2/20  |
| R383622 | 6  | 15 | 0  | 0.00%  | 89   | 0  | 0.00% | 12/2/20  |
| R341827 | 15 | 19 | 0  | 0.00%  | 289  | 0  | 0.00% | 12/2/20  |
| R325147 | 12 | 22 | 0  | 0.00%  | 265  | 0  | 0.00% | 12/2/20  |
| R383220 | 5  | 16 | 0  | 0.00%  | 80   | 0  | 0.00% | 12/2/20  |
| R325554 | 16 | 24 | 0  | 0.00%  | 384  | 0  | 0.00% | 12/2/20  |
| R325249 | 16 | 20 | 0  | 0.00%  | 326  | 0  | 0.00% | 12/2/20  |
| R324855 | 1  | 29 | 0  | 0.00%  | 29   | 0  | 0.00% | 12/2/20  |
| R341850 | 13 | 19 | 0  | 0.00%  | 241  | 0  | 0.00% | 12/2/20  |
| R334335 | 3  | 24 | 0  | 0.00%  | 71   | 0  | 0.00% | 12/2/20  |
| R341840 | 5  | 24 | 0  | 0.00%  | 118  | 0  | 0.00% | 12/2/20  |
| R325139 | 34 | 24 | 0  | 0.00%  | 829  | 0  | 0.00% | 12/2/20  |
| R382442 | 30 | 24 | 0  | 0.00%  | 710  | 0  | 0.00% | 12/2/20  |
| R383214 | 1  | 7  | 0  | 0.00%  | 7    | 0  | 0.00% | 12/2/20  |
| R343002 | 12 | 23 | 0  | 0.00%  | 271  | 0  | 0.00% | 12/2/20  |
| R325125 | 2  | 20 | 0  | 0.00%  | 40   | 0  | 0.00% | 12/2/20  |
| R425408 | 40 | 23 | 0  | 0.00%  | 934  | 0  | 0.00% | 12/2/20  |
| R334324 | 3  | 18 | 0  | 0.00%  | 53   | 0  | 0.00% | 12/2/20  |
| R324836 | 56 | 19 | 4  | 7.14%  | 1069 | 4  | 0.37% | 12/3/20  |
| R382442 | 15 | 22 | 3  | 20.00% | 335  | 4  | 1.19% | 12/3/20  |
| R325305 | 58 | 23 | 3  | 5.17%  | 1347 | 2  | 0.15% | 12/3/20  |
| R325137 | 59 | 24 | 3  | 5.08%  | 1401 | 3  | 0.21% | 12/3/20  |
| R424259 | 5  | 22 | 2  | 40.00% | 110  | 3  | 2.73% | 12/3/20  |



|         |    |    |   |        |      |   |       |         |
|---------|----|----|---|--------|------|---|-------|---------|
| R325554 | 17 | 23 | 2 | 11.76% | 399  | 2 | 0.50% | 12/3/20 |
| R342986 | 3  | 10 | 1 | 33.33% | 31   | 1 | 3.23% | 12/3/20 |
| R339478 | 23 | 24 | 1 | 4.35%  | 548  | 1 | 0.18% | 12/3/20 |
| R325127 | 25 | 23 | 1 | 4.00%  | 573  | 1 | 0.17% | 12/3/20 |
| R341057 | 26 | 22 | 1 | 3.85%  | 561  | 1 | 0.18% | 12/3/20 |
| R341827 | 7  | 18 | 0 | 0.00%  | 125  | 0 | 0.00% | 12/3/20 |
| R325147 | 4  | 20 | 0 | 0.00%  | 79   | 0 | 0.00% | 12/3/20 |
| R326820 | 1  | 16 | 0 | 0.00%  | 16   | 0 | 0.00% | 12/3/20 |
| R325134 | 10 | 24 | 0 | 0.00%  | 239  | 0 | 0.00% | 12/3/20 |
| R324855 | 9  | 24 | 0 | 0.00%  | 214  | 0 | 0.00% | 12/3/20 |
| R325128 | 17 | 24 | 0 | 0.00%  | 400  | 0 | 0.00% | 12/3/20 |
| R423648 | 12 | 23 | 0 | 0.00%  | 281  | 0 | 0.00% | 12/3/20 |
| R325129 | 1  | 19 | 0 | 0.00%  | 19   | 0 | 0.00% | 12/3/20 |
| R339483 | 8  | 19 | 0 | 0.00%  | 155  | 0 | 0.00% | 12/3/20 |
| R423627 | 8  | 24 | 0 | 0.00%  | 188  | 0 | 0.00% | 12/3/20 |
| R423633 | 2  | 24 | 0 | 0.00%  | 48   | 0 | 0.00% | 12/3/20 |
| R342151 | 5  | 19 | 0 | 0.00%  | 95   | 0 | 0.00% | 12/3/20 |
| R425408 | 16 | 23 | 0 | 0.00%  | 372  | 0 | 0.00% | 12/3/20 |
| R325125 | 21 | 24 | 6 | 28.57% | 502  | 1 | 0.20% | 12/4/20 |
| R382442 | 24 | 23 | 3 | 12.50% | 547  | 5 | 0.91% | 12/4/20 |
| R340789 | 7  | 17 | 1 | 14.29% | 122  | 1 | 0.82% | 12/4/20 |
| R424384 | 9  | 22 | 1 | 11.11% | 201  | 1 | 0.50% | 12/4/20 |
| R325529 | 18 | 22 | 1 | 5.56%  | 403  | 1 | 0.25% | 12/4/20 |
| R325147 | 22 | 21 | 1 | 4.55%  | 451  | 1 | 0.22% | 12/4/20 |
| R341823 | 2  | 16 | 0 | 0.00%  | 32   | 0 | 0.00% | 12/4/20 |
| R325134 | 2  | 17 | 0 | 0.00%  | 33   | 0 | 0.00% | 12/4/20 |
| R342167 | 1  | 22 | 0 | 0.00%  | 22   | 0 | 0.00% | 12/4/20 |
| R325249 | 14 | 22 | 0 | 0.00%  | 310  | 0 | 0.00% | 12/4/20 |
| R343003 | 10 | 24 | 0 | 0.00%  | 240  | 0 | 0.00% | 12/4/20 |
| R324833 | 49 | 21 | 0 | 0.00%  | 1045 | 0 | 0.00% | 12/4/20 |
| R325755 | 6  | 21 | 0 | 0.00%  | 126  | 0 | 0.00% | 12/4/20 |
| R342986 | 4  | 19 | 0 | 0.00%  | 77   | 0 | 0.00% | 12/4/20 |
| R325127 | 15 | 23 | 0 | 0.00%  | 349  | 0 | 0.00% | 12/4/20 |
| R341858 | 31 | 24 | 0 | 0.00%  | 729  | 0 | 0.00% | 12/4/20 |
| R423627 | 7  | 20 | 0 | 0.00%  | 137  | 0 | 0.00% | 12/4/20 |
| R334342 | 4  | 24 | 0 | 0.00%  | 94   | 0 | 0.00% | 12/4/20 |
| R339485 | 4  | 21 | 0 | 0.00%  | 84   | 0 | 0.00% | 12/4/20 |
| R424356 | 4  | 24 | 0 | 0.00%  | 95   | 0 | 0.00% | 12/4/20 |
| R324851 | 13 | 24 | 0 | 0.00%  | 312  | 0 | 0.00% | 12/4/20 |
| R326854 | 2  | 23 | 0 | 0.00%  | 45   | 0 | 0.00% | 12/4/20 |
| R383226 | 2  | 19 | 0 | 0.00%  | 38   | 0 | 0.00% | 12/5/20 |
| R325249 | 11 | 23 | 1 | 9.09%  | 254  | 1 | 0.39% | 12/7/20 |
| R424410 | 10 | 21 | 0 | 0.00%  | 211  | 0 | 0.00% | 12/7/20 |
| R424386 | 7  | 20 | 0 | 0.00%  | 140  | 0 | 0.00% | 12/7/20 |
| R339853 | 15 | 24 | 0 | 0.00%  | 360  | 0 | 0.00% | 12/7/20 |
| R325127 | 26 | 23 | 0 | 0.00%  | 595  | 0 | 0.00% | 12/7/20 |
| R325148 | 6  | 23 | 0 | 0.00%  | 140  | 0 | 0.00% | 12/7/20 |
| R325570 | 2  | 18 | 0 | 0.00%  | 36   | 0 | 0.00% | 12/7/20 |
| R325125 | 50 | 24 | 4 | 8.00%  | 1184 | 5 | 0.42% | 12/8/20 |
| R325129 | 8  | 21 | 1 | 12.50% | 168  | 1 | 0.60% | 12/8/20 |
| R339851 | 17 | 22 | 1 | 5.88%  | 374  | 1 | 0.27% | 12/8/20 |
| R325305 | 53 | 24 | 1 | 1.89%  | 1261 | 1 | 0.08% | 12/8/20 |
| R325241 | 60 | 16 | 1 | 1.67%  | 980  | 2 | 0.20% | 12/8/20 |
| R341827 | 5  | 17 | 0 | 0.00%  | 84   | 0 | 0.00% | 12/8/20 |
| R326820 | 8  | 21 | 0 | 0.00%  | 165  | 0 | 0.00% | 12/8/20 |
| R325134 | 9  | 24 | 0 | 0.00%  | 216  | 0 | 0.00% | 12/8/20 |
| R339422 | 4  | 23 | 0 | 0.00%  | 92   | 0 | 0.00% | 12/8/20 |
| R342167 | 1  | 16 | 0 | 0.00%  | 16   | 0 | 0.00% | 12/8/20 |

|         |    |    |   |         |      |   |        |          |
|---------|----|----|---|---------|------|---|--------|----------|
| R334327 | 3  | 20 | 0 | 0.00%   | 59   | 0 | 0.00%  | 12/8/20  |
| R339472 | 1  | 21 | 0 | 0.00%   | 21   | 0 | 0.00%  | 12/8/20  |
| R341057 | 25 | 23 | 0 | 0.00%   | 566  | 0 | 0.00%  | 12/8/20  |
| R425408 | 46 | 23 | 0 | 0.00%   | 1076 | 0 | 0.00%  | 12/8/20  |
| R339490 | 1  | 7  | 0 | 0.00%   | 7    | 0 | 0.00%  | 12/8/20  |
| R325129 | 5  | 19 | 3 | 60.00%  | 94   | 3 | 3.19%  | 12/9/20  |
| R325127 | 14 | 23 | 2 | 14.29%  | 323  | 2 | 0.62%  | 12/9/20  |
| R425408 | 55 | 24 | 2 | 3.64%   | 1307 | 3 | 0.23%  | 12/9/20  |
| R326820 | 5  | 23 | 1 | 20.00%  | 115  | 1 | 0.87%  | 12/9/20  |
| R325529 | 6  | 23 | 1 | 16.67%  | 135  | 1 | 0.74%  | 12/9/20  |
| R382442 | 18 | 19 | 1 | 5.56%   | 348  | 1 | 0.29%  | 12/9/20  |
| R325125 | 20 | 23 | 1 | 5.00%   | 456  | 1 | 0.22%  | 12/9/20  |
| R341866 | 28 | 23 | 1 | 3.57%   | 653  | 1 | 0.15%  | 12/9/20  |
| R383622 | 6  | 17 | 0 | 0.00%   | 103  | 0 | 0.00%  | 12/9/20  |
| R341827 | 9  | 17 | 0 | 0.00%   | 156  | 0 | 0.00%  | 12/9/20  |
| R325147 | 5  | 16 | 0 | 0.00%   | 81   | 0 | 0.00%  | 12/9/20  |
| R424410 | 5  | 18 | 0 | 0.00%   | 89   | 0 | 0.00%  | 12/9/20  |
| R325249 | 15 | 23 | 0 | 0.00%   | 352  | 0 | 0.00%  | 12/9/20  |
| R341850 | 13 | 20 | 0 | 0.00%   | 265  | 0 | 0.00%  | 12/9/20  |
| R341840 | 5  | 21 | 0 | 0.00%   | 106  | 0 | 0.00%  | 12/9/20  |
| R424428 | 6  | 18 | 0 | 0.00%   | 108  | 0 | 0.00%  | 12/9/20  |
| R339318 | 4  | 20 | 0 | 0.00%   | 81   | 0 | 0.00%  | 12/9/20  |
| R382276 | 1  | 24 | 0 | 0.00%   | 24   | 0 | 0.00%  | 12/9/20  |
| R426349 | 10 | 24 | 0 | 0.00%   | 237  | 0 | 0.00%  | 12/9/20  |
| R325139 | 36 | 22 | 0 | 0.00%   | 809  | 0 | 0.00%  | 12/9/20  |
| R334342 | 4  | 24 | 0 | 0.00%   | 96   | 0 | 0.00%  | 12/9/20  |
| R339478 | 12 | 18 | 0 | 0.00%   | 210  | 0 | 0.00%  | 12/9/20  |
| R422912 | 3  | 22 | 0 | 0.00%   | 67   | 0 | 0.00%  | 12/9/20  |
| R343002 | 12 | 22 | 0 | 0.00%   | 265  | 0 | 0.00%  | 12/9/20  |
| R334324 | 3  | 19 | 0 | 0.00%   | 58   | 0 | 0.00%  | 12/9/20  |
| R324851 | 60 | 24 | 5 | 8.33%   | 1442 | 5 | 0.35%  | 12/10/20 |
| R325128 | 19 | 24 | 2 | 10.53%  | 447  | 2 | 0.45%  | 12/10/20 |
| R325305 | 56 | 23 | 2 | 3.57%   | 1302 | 1 | 0.08%  | 12/10/20 |
| R325129 | 2  | 12 | 1 | 50.00%  | 23   | 1 | 4.35%  | 12/10/20 |
| R342986 | 6  | 24 | 1 | 16.67%  | 145  | 1 | 0.69%  | 12/10/20 |
| R324836 | 51 | 20 | 1 | 1.96%   | 1029 | 3 | 0.29%  | 12/10/20 |
| R341827 | 6  | 16 | 0 | 0.00%   | 97   | 0 | 0.00%  | 12/10/20 |
| R325147 | 30 | 20 | 0 | 0.00%   | 601  | 0 | 0.00%  | 12/10/20 |
| R325554 | 13 | 21 | 0 | 0.00%   | 267  | 0 | 0.00%  | 12/10/20 |
| R325134 | 12 | 23 | 0 | 0.00%   | 275  | 0 | 0.00%  | 12/10/20 |
| R334335 | 3  | 24 | 0 | 0.00%   | 72   | 0 | 0.00%  | 12/10/20 |
| R325755 | 8  | 22 | 0 | 0.00%   | 174  | 0 | 0.00%  | 12/10/20 |
| R339483 | 8  | 20 | 0 | 0.00%   | 157  | 0 | 0.00%  | 12/10/20 |
| R334327 | 13 | 23 | 0 | 0.00%   | 303  | 0 | 0.00%  | 12/10/20 |
| R342151 | 5  | 20 | 0 | 0.00%   | 98   | 0 | 0.00%  | 12/10/20 |
| R325125 | 7  | 24 | 0 | 0.00%   | 166  | 0 | 0.00%  | 12/10/20 |
| R325125 | 8  | 24 | 3 | 37.50%  | 188  | 8 | 4.26%  | 12/11/20 |
| R426349 | 13 | 21 | 3 | 23.08%  | 270  | 3 | 1.11%  | 12/11/20 |
| R382253 | 36 | 20 | 2 | 5.56%   | 705  | 2 | 0.28%  | 12/11/20 |
| R324851 | 1  | 3  | 1 | 100.00% | 3    | 1 | 33.33% | 12/11/20 |
| R325137 | 11 | 24 | 1 | 9.09%   | 264  | 6 | 2.27%  | 12/11/20 |
| R382442 | 13 | 24 | 1 | 7.69%   | 309  | 1 | 0.32%  | 12/11/20 |
| R342167 | 1  | 22 | 0 | 0.00%   | 22   | 0 | 0.00%  | 12/11/20 |
| R325249 | 13 | 23 | 0 | 0.00%   | 296  | 0 | 0.00%  | 12/11/20 |
| R426748 | 1  | 9  | 0 | 0.00%   | 9    | 0 | 0.00%  | 12/11/20 |
| R343003 | 27 | 23 | 0 | 0.00%   | 625  | 0 | 0.00%  | 12/11/20 |
| R324833 | 49 | 21 | 0 | 0.00%   | 1052 | 0 | 0.00%  | 12/11/20 |
| R424392 | 3  | 18 | 0 | 0.00%   | 55   | 0 | 0.00%  | 12/11/20 |

|         |    |    |   |         |      |    |       |          |
|---------|----|----|---|---------|------|----|-------|----------|
| R342986 | 3  | 19 | 0 | 0.00%   | 58   | 0  | 0.00% | 12/11/20 |
| R324727 | 5  | 23 | 0 | 0.00%   | 117  | 0  | 0.00% | 12/11/20 |
| R341858 | 31 | 23 | 0 | 0.00%   | 727  | 0  | 0.00% | 12/11/20 |
| R339492 | 4  | 17 | 0 | 0.00%   | 67   | 0  | 0.00% | 12/11/20 |
| R325529 | 6  | 23 | 0 | 0.00%   | 136  | 0  | 0.00% | 12/11/20 |
| R339485 | 4  | 22 | 0 | 0.00%   | 89   | 0  | 0.00% | 12/11/20 |
| R424356 | 1  | 24 | 0 | 0.00%   | 24   | 0  | 0.00% | 12/11/20 |
| R326854 | 1  | 21 | 0 | 0.00%   | 21   | 0  | 0.00% | 12/11/20 |
| R325125 | 4  | 20 | 2 | 50.00%  | 80   | 4  | 5.00% | 12/12/20 |
| R383226 | 2  | 21 | 0 | 0.00%   | 41   | 0  | 0.00% | 12/12/20 |
| R325138 | 1  | 14 | 0 | 0.00%   | 14   | 0  | 0.00% | 12/12/20 |
| R424398 | 5  | 21 | 1 | 20.00%  | 103  | 1  | 0.97% | 12/14/20 |
| R424410 | 10 | 22 | 1 | 10.00%  | 217  | 1  | 0.46% | 12/14/20 |
| R424386 | 8  | 18 | 0 | 0.00%   | 143  | 0  | 0.00% | 12/14/20 |
| R325249 | 9  | 20 | 0 | 0.00%   | 176  | 0  | 0.00% | 12/14/20 |
| R325755 | 7  | 22 | 0 | 0.00%   | 153  | 0  | 0.00% | 12/14/20 |
| R424428 | 1  | 17 | 0 | 0.00%   | 17   | 0  | 0.00% | 12/14/20 |
| R325127 | 26 | 23 | 0 | 0.00%   | 596  | 0  | 0.00% | 12/14/20 |
| R382276 | 1  | 24 | 0 | 0.00%   | 24   | 0  | 0.00% | 12/14/20 |
| R325129 | 7  | 20 | 2 | 28.57%  | 140  | 2  | 1.43% | 12/15/20 |
| R325305 | 54 | 23 | 2 | 3.70%   | 1255 | 3  | 0.24% | 12/15/20 |
| R325529 | 6  | 21 | 1 | 16.67%  | 128  | 1  | 0.78% | 12/15/20 |
| R325125 | 7  | 24 | 1 | 14.29%  | 166  | 1  | 0.60% | 12/15/20 |
| R325134 | 10 | 24 | 1 | 10.00%  | 238  | 1  | 0.42% | 12/15/20 |
| R339853 | 11 | 23 | 1 | 9.09%   | 258  | 1  | 0.39% | 12/15/20 |
| R325127 | 14 | 23 | 1 | 7.14%   | 320  | 1  | 0.31% | 12/15/20 |
| R339851 | 15 | 22 | 1 | 6.67%   | 328  | 1  | 0.30% | 12/15/20 |
| R382442 | 15 | 22 | 1 | 6.67%   | 336  | 1  | 0.30% | 12/15/20 |
| R325241 | 59 | 17 | 1 | 1.69%   | 975  | 1  | 0.10% | 12/15/20 |
| R425408 | 64 | 24 | 1 | 1.56%   | 1527 | 2  | 0.13% | 12/15/20 |
| R341849 | 13 | 23 | 0 | 0.00%   | 300  | 0  | 0.00% | 12/15/20 |
| R383622 | 6  | 16 | 0 | 0.00%   | 96   | 0  | 0.00% | 12/15/20 |
| R341827 | 7  | 16 | 0 | 0.00%   | 111  | 0  | 0.00% | 12/15/20 |
| R339422 | 5  | 18 | 0 | 0.00%   | 90   | 0  | 0.00% | 12/15/20 |
| R325139 | 9  | 23 | 0 | 0.00%   | 204  | 0  | 0.00% | 12/15/20 |
| R325570 | 2  | 16 | 0 | 0.00%   | 32   | 0  | 0.00% | 12/15/20 |
| R341057 | 27 | 22 | 0 | 0.00%   | 590  | 0  | 0.00% | 12/15/20 |
| R339490 | 1  | 9  | 0 | 0.00%   | 9    | 0  | 0.00% | 12/15/20 |
| R324836 | 56 | 15 | 4 | 7.14%   | 836  | 3  | 0.36% | 12/16/20 |
| R341849 | 19 | 23 | 3 | 15.79%  | 441  | 2  | 0.45% | 12/16/20 |
| R426349 | 10 | 24 | 2 | 20.00%  | 237  | 2  | 0.84% | 12/16/20 |
| R339318 | 4  | 21 | 1 | 25.00%  | 85   | 1  | 1.18% | 12/16/20 |
| R341850 | 13 | 20 | 1 | 7.69%   | 254  | 1  | 0.39% | 12/16/20 |
| R325249 | 16 | 21 | 1 | 6.25%   | 335  | 1  | 0.30% | 12/16/20 |
| R425408 | 34 | 24 | 1 | 2.94%   | 812  | 1  | 0.12% | 12/16/20 |
| R341827 | 8  | 20 | 0 | 0.00%   | 156  | 0  | 0.00% | 12/16/20 |
| R325554 | 14 | 20 | 0 | 0.00%   | 280  | 0  | 0.00% | 12/16/20 |
| R342167 | 1  | 18 | 0 | 0.00%   | 18   | 0  | 0.00% | 12/16/20 |
| R334335 | 4  | 19 | 0 | 0.00%   | 74   | 0  | 0.00% | 12/16/20 |
| R341840 | 5  | 22 | 0 | 0.00%   | 109  | 0  | 0.00% | 12/16/20 |
| R325755 | 9  | 19 | 0 | 0.00%   | 173  | 0  | 0.00% | 12/16/20 |
| R325137 | 3  | 20 | 0 | 0.00%   | 61   | 0  | 0.00% | 12/16/20 |
| R334342 | 4  | 25 | 0 | 0.00%   | 98   | 0  | 0.00% | 12/16/20 |
| R342151 | 5  | 20 | 0 | 0.00%   | 98   | 0  | 0.00% | 12/16/20 |
| R334324 | 3  | 18 | 0 | 0.00%   | 55   | 0  | 0.00% | 12/16/20 |
| R324833 | 50 | 20 | 7 | 14.00%  | 1013 | 12 | 1.18% | 12/18/20 |
| R324833 | 50 | 20 | 7 | 14.00%  | 1013 | 12 | 1.18% | 12/18/20 |
| R339492 | 4  | 16 | 4 | 100.00% | 65   | 4  | 6.15% | 12/18/20 |

|         |    |    |    |         |      |    |       |          |
|---------|----|----|----|---------|------|----|-------|----------|
| R339492 | 4  | 16 | 4  | 100.00% | 65   | 4  | 6.15% | 12/18/20 |
| R339483 | 8  | 18 | 2  | 25.00%  | 146  | 2  | 1.37% | 12/18/20 |
| R339483 | 8  | 18 | 2  | 25.00%  | 146  | 2  | 1.37% | 12/18/20 |
| R339318 | 4  | 18 | 1  | 25.00%  | 71   | 2  | 2.82% | 12/19/20 |
| R339318 | 4  | 18 | 1  | 25.00%  | 71   | 2  | 2.82% | 12/19/20 |
| R382276 | 1  | 24 | 1  | 100.00% | 24   | 2  | 8.33% | 12/21/20 |
| R382276 | 1  | 24 | 1  | 100.00% | 24   | 2  | 8.33% | 12/21/20 |
| R324833 | 25 | 23 | 2  | 8.00%   | 563  | 4  | 0.71% | 12/23/20 |
| R324833 | 25 | 23 | 2  | 8.00%   | 563  | 4  | 0.71% | 12/23/20 |
| R341866 | 28 | 24 | 7  | 25.00%  | 669  | 15 | 2.24% | 1/4/21   |
| R341866 | 28 | 24 | 7  | 25.00%  | 669  | 15 | 2.24% | 1/4/21   |
| R426787 | 31 | 24 | 6  | 19.35%  | 739  | 12 | 1.62% | 1/4/21   |
| R426787 | 31 | 24 | 6  | 19.35%  | 739  | 12 | 1.62% | 1/4/21   |
| R325554 | 4  | 21 | 3  | 75.00%  | 84   | 2  | 2.38% | 1/4/21   |
| R325554 | 4  | 21 | 3  | 75.00%  | 84   | 2  | 2.38% | 1/4/21   |
| R325241 | 41 | 24 | 2  | 4.88%   | 972  | 10 | 1.03% | 1/4/21   |
| R325241 | 41 | 24 | 2  | 4.88%   | 972  | 10 | 1.03% | 1/4/21   |
| R324833 | 7  | 24 | 1  | 14.29%  | 165  | 4  | 2.42% | 1/4/21   |
| R324833 | 7  | 24 | 1  | 14.29%  | 165  | 4  | 2.42% | 1/4/21   |
| R382276 | 3  | 22 | 1  | 33.33%  | 66   | 6  | 9.09% | 1/4/21   |
| R382276 | 3  | 22 | 1  | 33.33%  | 66   | 6  | 9.09% | 1/4/21   |
| R325125 | 92 | 24 | 10 | 10.87%  | 2205 | 1  | 0.05% | 1/5/21   |
| R325125 | 92 | 24 | 10 | 10.87%  | 2205 | 1  | 0.05% | 1/5/21   |
| R382442 | 32 | 23 | 3  | 9.38%   | 747  | 8  | 1.07% | 1/5/21   |
| R382442 | 32 | 23 | 3  | 9.38%   | 747  | 8  | 1.07% | 1/5/21   |
| R425408 | 66 | 23 | 3  | 4.55%   | 1504 | 11 | 0.73% | 1/5/21   |
| R425408 | 66 | 23 | 3  | 4.55%   | 1504 | 11 | 0.73% | 1/5/21   |
| R343003 | 11 | 23 | 2  | 18.18%  | 250  | 4  | 1.60% | 1/5/21   |
| R343003 | 11 | 23 | 2  | 18.18%  | 250  | 4  | 1.60% | 1/5/21   |
| R325129 | 9  | 21 | 2  | 22.22%  | 187  | 4  | 2.14% | 1/5/21   |
| R325129 | 9  | 21 | 2  | 22.22%  | 187  | 4  | 2.14% | 1/5/21   |
| R339472 | 33 | 23 | 2  | 6.06%   | 772  | 9  | 1.17% | 1/5/21   |
| R339472 | 33 | 23 | 2  | 6.06%   | 772  | 9  | 1.17% | 1/5/21   |
| R341827 | 55 | 19 | 1  | 1.82%   | 1065 | 4  | 0.38% | 1/5/21   |
| R341827 | 55 | 19 | 1  | 1.82%   | 1065 | 4  | 0.38% | 1/5/21   |
| R325148 | 6  | 20 | 1  | 16.67%  | 118  | 1  | 0.85% | 1/5/21   |
| R325148 | 6  | 20 | 1  | 16.67%  | 118  | 1  | 0.85% | 1/5/21   |
| R341825 | 16 | 19 | 1  | 6.25%   | 306  | 4  | 1.31% | 1/5/21   |
| R341825 | 16 | 19 | 1  | 6.25%   | 306  | 4  | 1.31% | 1/5/21   |
| R382253 | 29 | 24 | 10 | 34.48%  | 685  | 22 | 3.21% | 1/6/21   |
| R382253 | 29 | 24 | 10 | 34.48%  | 685  | 22 | 3.21% | 1/6/21   |
| R340789 | 15 | 19 | 2  | 13.33%  | 292  | 4  | 1.37% | 1/6/21   |
| R340789 | 15 | 19 | 2  | 13.33%  | 292  | 4  | 1.37% | 1/6/21   |
| R341850 | 13 | 20 | 2  | 15.38%  | 261  | 4  | 1.53% | 1/6/21   |
| R341850 | 13 | 20 | 2  | 15.38%  | 261  | 4  | 1.53% | 1/6/21   |
| R339472 | 21 | 24 | 2  | 9.52%   | 501  | 3  | 0.60% | 1/6/21   |
| R339472 | 21 | 24 | 2  | 9.52%   | 501  | 3  | 0.60% | 1/6/21   |
| R425408 | 34 | 23 | 2  | 5.88%   | 781  | 3  | 0.38% | 1/6/21   |
| R425408 | 34 | 23 | 2  | 5.88%   | 781  | 3  | 0.38% | 1/6/21   |
| R339422 | 4  | 23 | 1  | 25.00%  | 92   | 4  | 4.35% | 1/6/21   |
| R339422 | 4  | 23 | 1  | 25.00%  | 92   | 4  | 4.35% | 1/6/21   |
| R339308 | 2  | 19 | 1  | 50.00%  | 38   | 1  | 2.63% | 1/6/21   |
| R339308 | 2  | 19 | 1  | 50.00%  | 38   | 1  | 2.63% | 1/6/21   |
| R325129 | 3  | 13 | 1  | 33.33%  | 39   | 2  | 5.13% | 1/6/21   |
| R325129 | 3  | 13 | 1  | 33.33%  | 39   | 2  | 5.13% | 1/6/21   |
| R339318 | 4  | 20 | 1  | 25.00%  | 80   | 2  | 2.50% | 1/6/21   |
| R339318 | 4  | 20 | 1  | 25.00%  | 80   | 2  | 2.50% | 1/6/21   |
| R426665 | 10 | 17 | 1  | 10.00%  | 172  | 2  | 1.16% | 1/6/21   |

|         |    |    |   |         |      |    |       |         |
|---------|----|----|---|---------|------|----|-------|---------|
| R426665 | 10 | 17 | 1 | 10.00%  | 172  | 2  | 1.16% | 1/6/21  |
| R382442 | 15 | 24 | 1 | 6.67%   | 355  | 10 | 2.82% | 1/6/21  |
| R382442 | 15 | 24 | 1 | 6.67%   | 355  | 10 | 2.82% | 1/6/21  |
| R325305 | 55 | 24 | 9 | 16.36%  | 1323 | 27 | 2.04% | 1/7/21  |
| R325305 | 55 | 24 | 9 | 16.36%  | 1323 | 27 | 2.04% | 1/7/21  |
| R423648 | 32 | 23 | 7 | 21.88%  | 739  | 13 | 1.76% | 1/7/21  |
| R423648 | 32 | 23 | 7 | 21.88%  | 739  | 13 | 1.76% | 1/7/21  |
| R382442 | 19 | 24 | 7 | 36.84%  | 448  | 21 | 4.69% | 1/7/21  |
| R382442 | 19 | 24 | 7 | 36.84%  | 448  | 21 | 4.69% | 1/7/21  |
| R324836 | 59 | 17 | 4 | 6.78%   | 1007 | 14 | 1.39% | 1/7/21  |
| R324836 | 59 | 17 | 4 | 6.78%   | 1007 | 14 | 1.39% | 1/7/21  |
| R325134 | 14 | 23 | 1 | 7.14%   | 327  | 2  | 0.61% | 1/7/21  |
| R325134 | 14 | 23 | 1 | 7.14%   | 327  | 2  | 0.61% | 1/7/21  |
| R325249 | 5  | 19 | 1 | 20.00%  | 97   | 2  | 2.06% | 1/7/21  |
| R325249 | 5  | 19 | 1 | 20.00%  | 97   | 2  | 2.06% | 1/7/21  |
| R334335 | 4  | 20 | 1 | 25.00%  | 80   | 2  | 2.50% | 1/7/21  |
| R334335 | 4  | 20 | 1 | 25.00%  | 80   | 2  | 2.50% | 1/7/21  |
| R426349 | 11 | 23 | 1 | 9.09%   | 253  | 4  | 1.58% | 1/7/21  |
| R426349 | 11 | 23 | 1 | 9.09%   | 253  | 4  | 1.58% | 1/7/21  |
| R324833 | 50 | 21 | 5 | 10.00%  | 1062 | 12 | 1.13% | 1/8/21  |
| R324833 | 50 | 21 | 5 | 10.00%  | 1062 | 12 | 1.13% | 1/8/21  |
| R324851 | 63 | 24 | 3 | 4.76%   | 1506 | 6  | 0.40% | 1/8/21  |
| R324851 | 63 | 24 | 3 | 4.76%   | 1506 | 6  | 0.40% | 1/8/21  |
| R325125 | 38 | 24 | 3 | 7.89%   | 901  | 1  | 0.11% | 1/8/21  |
| R325125 | 38 | 24 | 3 | 7.89%   | 901  | 1  | 0.11% | 1/8/21  |
| R326820 | 13 | 22 | 2 | 15.38%  | 290  | 3  | 1.03% | 1/8/21  |
| R326820 | 13 | 22 | 2 | 15.38%  | 290  | 3  | 1.03% | 1/8/21  |
| R424410 | 10 | 21 | 1 | 10.00%  | 208  | 1  | 0.48% | 1/8/21  |
| R424410 | 10 | 21 | 1 | 10.00%  | 208  | 1  | 0.48% | 1/8/21  |
| R325127 | 3  | 23 | 1 | 33.33%  | 69   | 2  | 2.90% | 1/8/21  |
| R325127 | 3  | 23 | 1 | 33.33%  | 69   | 2  | 2.90% | 1/8/21  |
| R339483 | 8  | 19 | 1 | 12.50%  | 152  | 2  | 1.32% | 1/8/21  |
| R339483 | 8  | 19 | 1 | 12.50%  | 152  | 2  | 1.32% | 1/8/21  |
| R334342 | 13 | 23 | 1 | 7.69%   | 305  | 2  | 0.66% | 1/8/21  |
| R334342 | 13 | 23 | 1 | 7.69%   | 305  | 2  | 0.66% | 1/8/21  |
| R325529 | 4  | 13 | 2 | 50.00%  | 53   | 4  | 7.55% | 1/9/21  |
| R325529 | 4  | 13 | 2 | 50.00%  | 53   | 4  | 7.55% | 1/9/21  |
| R324833 | 1  | 24 | 1 | 100.00% | 24   | 2  | 8.33% | 1/9/21  |
| R324833 | 1  | 24 | 1 | 100.00% | 24   | 2  | 8.33% | 1/9/21  |
| R334342 | 5  | 23 | 1 | 20.00%  | 113  | 1  | 0.88% | 1/9/21  |
| R334342 | 5  | 23 | 1 | 20.00%  | 113  | 1  | 0.88% | 1/9/21  |
| R325755 | 8  | 21 | 1 | 12.50%  | 169  | 1  | 0.59% | 1/11/21 |
| R325755 | 8  | 21 | 1 | 12.50%  | 169  | 1  | 0.59% | 1/11/21 |
| R425408 | 62 | 24 | 2 | 3.23%   | 1458 | 2  | 0.14% | 1/12/21 |
| R425408 | 62 | 24 | 2 | 3.23%   | 1458 | 2  | 0.14% | 1/12/21 |
| R325136 | 16 | 23 | 1 | 6.25%   | 361  | 1  | 0.28% | 1/12/21 |
| R325136 | 16 | 23 | 1 | 6.25%   | 361  | 1  | 0.28% | 1/12/21 |
| R325249 | 14 | 21 | 2 | 14.29%  | 298  | 3  | 1.01% | 1/13/21 |
| R325249 | 14 | 21 | 2 | 14.29%  | 298  | 3  | 1.01% | 1/13/21 |

---
