# Supplementary material for: Pooled Surveillance Testing Program for Asymptomatic SARS-CoV-2 Infections in K-12 Schools and Universities
Source: bioRxiv or medRxiv preprint supplement (doi:10.1101/2021.02.09.21251464), 2021-02-12
Supplement: Supplementary file [file media-3.pdf]

Supplementary Table 3. Raw data of each university tested between Sept 1, 2020 and Jan 13, 2021.

| University NO. | Pool number | Pool size | Pool Positive number | Pool Positivity rate | Individual number | Individual Positive number | Individual Positivity rate | Date     |
|----------------|-------------|-----------|----------------------|----------------------|-------------------|----------------------------|----------------------------|----------|
| R326848        | 10          | 24        | 0                    | 0.00%                | 240               | 0                          | 0.00%                      | 9/1/20   |
| R326848        | 12          | 23        | 0                    | 0.00%                | 277               | 0                          | 0.00%                      | 9/2/20   |
| R326848        | 17          | 21        | 0                    | 0.00%                | 365               | 0                          | 0.00%                      | 9/3/20   |
| R326848        | 11          | 18        | 0                    | 0.00%                | 199               | 0                          | 0.00%                      | 9/10/20  |
| R326848        | 2           | 24        | 0                    | 0.00%                | 48                | 0                          | 0.00%                      | 9/15/20  |
| R326848        | 8           | 22        | 4                    | 50.00%               | 179               | 2                          | 1.12%                      | 9/16/20  |
| R326848        | 5           | 24        | 0                    | 0.00%                | 121               | 0                          | 0.00%                      | 9/22/20  |
| R325293        | 10          | 23        | 5                    | 50.00%               | 225               | 8                          | 3.56%                      | 9/24/20  |
| R325302        | 3           | 20        | 0                    | 0.00%                | 61                | 0                          | 0.00%                      | 9/26/20  |
| R326848        | 6           | 22        | 0                    | 0.00%                | 134               | 0                          | 0.00%                      | 9/29/20  |
| R325302        | 1           | 18        | 0                    | 0.00%                | 18                | 0                          | 0.00%                      | 9/29/20  |
| R325293        | 5           | 25        | 1                    | 20.00%               | 124               | 1                          | 0.81%                      | 9/30/20  |
| R325283        | 1           | 24        | 0                    | 0.00%                | 24                | 0                          | 0.00%                      | 9/30/20  |
| R325269        | 6           | 22        | 0                    | 0.00%                | 131               | 0                          | 0.00%                      | 9/30/20  |
| R325131        | 10          | 22        | 1                    | 10.00%               | 223               | 1                          | 0.45%                      | 10/1/20  |
| R325293        | 2           | 25        | 0                    | 0.00%                | 50                | 0                          | 0.00%                      | 10/1/20  |
| R325293        | 4           | 24        | 0                    | 0.00%                | 96                | 0                          | 0.00%                      | 10/2/20  |
| R325302        | 5           | 22        | 3                    | 60.00%               | 110               | 2                          | 1.82%                      | 10/3/20  |
| R325130        | 4           | 24        | 0                    | 0.00%                | 94                | 0                          | 0.00%                      | 10/6/20  |
| R326848        | 9           | 21        | 0                    | 0.00%                | 189               | 0                          | 0.00%                      | 10/6/20  |
| R325283        | 1           | 24        | 0                    | 0.00%                | 24                | 0                          | 0.00%                      | 10/7/20  |
| R325170        | 1           | 23        | 0                    | 0.00%                | 23                | 0                          | 0.00%                      | 10/7/20  |
| R325302        | 1           | 9         | 0                    | 0.00%                | 9                 | 0                          | 0.00%                      | 10/8/20  |
| R325269        | 2           | 22        | 0                    | 0.00%                | 43                | 0                          | 0.00%                      | 10/8/20  |
| R326848        | 2           | 20        | 0                    | 0.00%                | 39                | 0                          | 0.00%                      | 10/9/20  |
| R325130        | 2           | 23        | 0                    | 0.00%                | 46                | 0                          | 0.00%                      | 10/13/20 |
| R326848        | 4           | 22        | 0                    | 0.00%                | 87                | 0                          | 0.00%                      | 10/13/20 |
| R325283        | 1           | 24        | 0                    | 0.00%                | 24                | 0                          | 0.00%                      | 10/14/20 |
| R325269        | 2           | 23        | 0                    | 0.00%                | 46                | 0                          | 0.00%                      | 10/14/20 |
| R325302        | 2           | 17        | 0                    | 0.00%                | 33                | 0                          | 0.00%                      | 10/15/20 |
| R325131        | 5           | 23        | 0                    | 0.00%                | 115               | 0                          | 0.00%                      | 10/15/20 |
| R325293        | 13          | 23        | 0                    | 0.00%                | 305               | 0                          | 0.00%                      | 10/19/20 |
| R325130        | 2           | 24        | 0                    | 0.00%                | 48                | 0                          | 0.00%                      | 10/20/20 |
| R325536        | 6           | 23        | 0                    | 0.00%                | 136               | 0                          | 0.00%                      | 10/20/20 |
| R325302        | 1           | 5         | 0                    | 0.00%                | 5                 | 0                          | 0.00%                      | 10/20/20 |
| R325293        | 6           | 19        | 0                    | 0.00%                | 112               | 0                          | 0.00%                      | 10/20/20 |
| R325283        | 1           | 24        | 0                    | 0.00%                | 24                | 0                          | 0.00%                      | 10/21/20 |
| R326848        | 8           | 24        | 0                    | 0.00%                | 192               | 0                          | 0.00%                      | 10/21/20 |

|         |    |    |    |         |     |    |        |          |
|---------|----|----|----|---------|-----|----|--------|----------|
| R425660 | 10 | 21 | 0  | 0.00%   | 210 | 0  | 0.00%  | 10/22/20 |
| R426905 | 1  | 24 | 0  | 0.00%   | 24  | 0  | 0.00%  | 10/23/20 |
| R326848 | 6  | 22 | 0  | 0.00%   | 130 | 0  | 0.00%  | 10/27/20 |
| R325536 | 7  | 23 | 0  | 0.00%   | 162 | 0  | 0.00%  | 10/27/20 |
| R325302 | 1  | 15 | 0  | 0.00%   | 15  | 0  | 0.00%  | 10/27/20 |
| R325170 | 4  | 22 | 0  | 0.00%   | 87  | 0  | 0.00%  | 10/27/20 |
| R325283 | 1  | 24 | 0  | 0.00%   | 24  | 0  | 0.00%  | 10/28/20 |
| R325130 | 4  | 23 | 0  | 0.00%   | 90  | 0  | 0.00%  | 10/28/20 |
| R325269 | 2  | 24 | 0  | 0.00%   | 48  | 0  | 0.00%  | 10/28/20 |
| R325131 | 5  | 21 | 0  | 0.00%   | 103 | 0  | 0.00%  | 10/29/20 |
| R325302 | 1  | 24 | 0  | 0.00%   | 24  | 0  | 0.00%  | 10/30/20 |
| R325170 | 2  | 22 | 0  | 0.00%   | 43  | 0  | 0.00%  | 11/2/20  |
| R325536 | 9  | 23 | 1  | 11.11%  | 204 | 1  | 0.49%  | 11/3/20  |
| R325130 | 4  | 24 | 0  | 0.00%   | 94  | 0  | 0.00%  | 11/3/20  |
| R326848 | 9  | 21 | 0  | 0.00%   | 191 | 0  | 0.00%  | 11/3/20  |
| R325302 | 2  | 20 | 0  | 0.00%   | 40  | 0  | 0.00%  | 11/3/20  |
| R325170 | 8  | 21 | 2  | 25.00%  | 166 | 4  | 2.41%  | 11/4/20  |
| R325283 | 1  | 24 | 0  | 0.00%   | 24  | 0  | 0.00%  | 11/4/20  |
| R325302 | 2  | 18 | 0  | 0.00%   | 36  | 0  | 0.00%  | 11/5/20  |
| R325293 | 2  | 25 | 0  | 0.00%   | 49  | 0  | 0.00%  | 11/5/20  |
| R326848 | 2  | 21 | 0  | 0.00%   | 42  | 0  | 0.00%  | 11/6/20  |
| R325302 | 2  | 17 | 0  | 0.00%   | 34  | 0  | 0.00%  | 11/7/20  |
| R325170 | 4  | 17 | 0  | 0.00%   | 67  | 0  | 0.00%  | 11/9/20  |
| R325130 | 2  | 24 | 0  | 0.00%   | 47  | 0  | 0.00%  | 11/10/20 |
| R326848 | 7  | 23 | 0  | 0.00%   | 162 | 0  | 0.00%  | 11/10/20 |
| R325536 | 11 | 22 | 0  | 0.00%   | 244 | 0  | 0.00%  | 11/10/20 |
| R325302 | 2  | 21 | 0  | 0.00%   | 41  | 0  | 0.00%  | 11/10/20 |
| R325293 | 2  | 24 | 0  | 0.00%   | 47  | 0  | 0.00%  | 11/10/20 |
| R325170 | 33 | 24 | 14 | 42.42%  | 781 | 16 | 2.05%  | 11/11/20 |
| R325269 | 2  | 21 | 2  | 100.00% | 41  | 2  | 4.88%  | 11/11/20 |
| R325283 | 1  | 24 | 0  | 0.00%   | 24  | 0  | 0.00%  | 11/11/20 |
| R325131 | 5  | 24 | 0  | 0.00%   | 120 | 0  | 0.00%  | 11/12/20 |
| R341828 | 6  | 22 | 4  | 66.67%  | 132 | 26 | 19.70% | 11/13/20 |
| R325302 | 2  | 19 | 0  | 0.00%   | 38  | 0  | 0.00%  | 11/13/20 |
| R425660 | 5  | 18 | 1  | 20.00%  | 89  | 5  | 5.62%  | 11/16/20 |
| R325302 | 2  | 17 | 0  | 0.00%   | 34  | 0  | 0.00%  | 11/16/20 |
| R340810 | 2  | 18 | 0  | 0.00%   | 36  | 0  | 0.00%  | 11/16/20 |
| R341869 | 2  | 20 | 0  | 0.00%   | 39  | 0  | 0.00%  | 11/16/20 |
| R325536 | 24 | 16 | 2  | 8.33%   | 395 | 4  | 1.01%  | 11/17/20 |
| R425660 | 12 | 21 | 1  | 8.33%   | 249 | 1  | 0.40%  | 11/17/20 |
| R326848 | 10 | 21 | 0  | 0.00%   | 210 | 0  | 0.00%  | 11/17/20 |
| R325302 | 2  | 20 | 0  | 0.00%   | 39  | 0  | 0.00%  | 11/17/20 |
| R340810 | 2  | 19 | 0  | 0.00%   | 37  | 0  | 0.00%  | 11/17/20 |

|         |    |    |   |         |     |   |       |          |
|---------|----|----|---|---------|-----|---|-------|----------|
| R325293 | 12 | 24 | 0 | 0.00%   | 285 | 0 | 0.00% | 11/17/20 |
| R325130 | 4  | 23 | 1 | 25.00%  | 92  | 1 | 1.09% | 11/18/20 |
| R325283 | 2  | 21 | 0 | 0.00%   | 41  | 0 | 0.00% | 11/18/20 |
| R341828 | 5  | 24 | 5 | 100.00% | 120 | 6 | 5.00% | 11/19/20 |
| R325302 | 2  | 19 | 1 | 50.00%  | 37  | 2 | 5.41% | 11/19/20 |
| R325131 | 7  | 22 | 0 | 0.00%   | 152 | 0 | 0.00% | 11/19/20 |
| R341869 | 2  | 12 | 0 | 0.00%   | 24  | 0 | 0.00% | 11/19/20 |
| R325536 | 7  | 17 | 0 | 0.00%   | 120 | 0 | 0.00% | 11/20/20 |
| R325302 | 1  | 25 | 0 | 0.00%   | 25  | 0 | 0.00% | 11/23/20 |
| R340810 | 2  | 19 | 0 | 0.00%   | 37  | 0 | 0.00% | 11/23/20 |
| R341869 | 2  | 19 | 0 | 0.00%   | 37  | 0 | 0.00% | 11/23/20 |
| R325269 | 2  | 20 | 2 | 100.00% | 39  | 2 | 5.13% | 11/24/20 |
| R326848 | 9  | 23 | 0 | 0.00%   | 203 | 0 | 0.00% | 11/24/20 |
| R325302 | 2  | 14 | 0 | 0.00%   | 28  | 0 | 0.00% | 11/24/20 |
| R339475 | 1  | 24 | 0 | 0.00%   | 24  | 0 | 0.00% | 11/24/20 |
| R341828 | 1  | 23 | 0 | 0.00%   | 23  | 0 | 0.00% | 11/24/20 |
| R340810 | 2  | 18 | 0 | 0.00%   | 35  | 0 | 0.00% | 11/25/20 |
| R341869 | 2  | 19 | 0 | 0.00%   | 38  | 0 | 0.00% | 11/30/20 |
| R325283 | 2  | 21 | 1 | 50.00%  | 41  | 1 | 2.44% | 12/1/20  |
| R325130 | 2  | 23 | 0 | 0.00%   | 45  | 0 | 0.00% | 12/1/20  |
| R325536 | 15 | 24 | 0 | 0.00%   | 353 | 0 | 0.00% | 12/1/20  |
| R341830 | 2  | 18 | 0 | 0.00%   | 35  | 0 | 0.00% | 12/1/20  |
| R325302 | 2  | 20 | 0 | 0.00%   | 39  | 0 | 0.00% | 12/1/20  |
| R340810 | 3  | 16 | 0 | 0.00%   | 47  | 0 | 0.00% | 12/1/20  |
| R341830 | 2  | 18 | 0 | 0.00%   | 36  | 0 | 0.00% | 12/2/20  |
| R325131 | 3  | 21 | 0 | 0.00%   | 64  | 0 | 0.00% | 12/2/20  |
| R325170 | 6  | 22 | 0 | 0.00%   | 134 | 0 | 0.00% | 12/2/20  |
| R340810 | 2  | 26 | 0 | 0.00%   | 52  | 0 | 0.00% | 12/2/20  |
| R423642 | 1  | 20 | 0 | 0.00%   | 20  | 0 | 0.00% | 12/3/20  |
| R326848 | 13 | 22 | 0 | 0.00%   | 282 | 0 | 0.00% | 12/3/20  |
| R325302 | 2  | 15 | 0 | 0.00%   | 30  | 0 | 0.00% | 12/3/20  |
| R326848 | 6  | 22 | 0 | 0.00%   | 134 | 0 | 0.00% | 12/4/20  |
| R341830 | 2  | 14 | 0 | 0.00%   | 27  | 0 | 0.00% | 12/4/20  |
| R325131 | 2  | 20 | 0 | 0.00%   | 39  | 0 | 0.00% | 12/4/20  |
| R340810 | 2  | 16 | 0 | 0.00%   | 32  | 0 | 0.00% | 12/4/20  |
| R341828 | 2  | 24 | 0 | 0.00%   | 47  | 0 | 0.00% | 12/4/20  |
| R341830 | 2  | 18 | 0 | 0.00%   | 36  | 0 | 0.00% | 12/5/20  |
| R325170 | 1  | 22 | 0 | 0.00%   | 22  | 0 | 0.00% | 12/5/20  |
| R340810 | 1  | 13 | 0 | 0.00%   | 13  | 0 | 0.00% | 12/5/20  |
| R424416 | 8  | 24 | 3 | 37.50%  | 192 | 3 | 1.56% | 12/7/20  |
| R325302 | 2  | 17 | 0 | 0.00%   | 33  | 0 | 0.00% | 12/7/20  |
| R325131 | 2  | 20 | 0 | 0.00%   | 40  | 0 | 0.00% | 12/7/20  |
| R341869 | 2  | 20 | 0 | 0.00%   | 39  | 0 | 0.00% | 12/7/20  |

|         |    |    |   |         |     |    |        |          |
|---------|----|----|---|---------|-----|----|--------|----------|
| R339475 | 3  | 24 | 1 | 33.33%  | 72  | 1  | 1.39%  | 12/8/20  |
| R325283 | 1  | 10 | 0 | 0.00%   | 10  | 0  | 0.00%  | 12/8/20  |
| R325130 | 1  | 21 | 0 | 0.00%   | 21  | 0  | 0.00%  | 12/8/20  |
| R326848 | 10 | 23 | 0 | 0.00%   | 227 | 0  | 0.00%  | 12/8/20  |
| R325536 | 4  | 22 | 0 | 0.00%   | 88  | 0  | 0.00%  | 12/8/20  |
| R341830 | 2  | 18 | 0 | 0.00%   | 36  | 0  | 0.00%  | 12/8/20  |
| R325302 | 2  | 24 | 0 | 0.00%   | 48  | 0  | 0.00%  | 12/8/20  |
| R340810 | 2  | 19 | 0 | 0.00%   | 37  | 0  | 0.00%  | 12/8/20  |
| R339475 | 3  | 24 | 0 | 0.00%   | 72  | 0  | 0.00%  | 12/9/20  |
| R339475 | 3  | 24 | 1 | 33.33%  | 72  | 1  | 1.39%  | 12/10/20 |
| R341830 | 2  | 18 | 0 | 0.00%   | 36  | 0  | 0.00%  | 12/10/20 |
| R325302 | 2  | 19 | 0 | 0.00%   | 37  | 0  | 0.00%  | 12/10/20 |
| R325131 | 2  | 20 | 0 | 0.00%   | 40  | 0  | 0.00%  | 12/10/20 |
| R340810 | 3  | 19 | 0 | 0.00%   | 58  | 0  | 0.00%  | 12/10/20 |
| R423642 | 1  | 21 | 0 | 0.00%   | 21  | 0  | 0.00%  | 12/11/20 |
| R325131 | 2  | 20 | 0 | 0.00%   | 40  | 0  | 0.00%  | 12/11/20 |
| R339475 | 3  | 24 | 0 | 0.00%   | 72  | 0  | 0.00%  | 12/11/20 |
| R341830 | 1  | 17 | 0 | 0.00%   | 17  | 0  | 0.00%  | 12/12/20 |
| R339475 | 3  | 25 | 0 | 0.00%   | 76  | 0  | 0.00%  | 12/12/20 |
| R326848 | 5  | 24 | 1 | 20.00%  | 119 | 1  | 0.84%  | 12/15/20 |
| R325130 | 1  | 21 | 0 | 0.00%   | 21  | 0  | 0.00%  | 12/15/20 |
| R341830 | 1  | 13 | 0 | 0.00%   | 13  | 0  | 0.00%  | 12/15/20 |
| R325302 | 2  | 24 | 0 | 0.00%   | 47  | 0  | 0.00%  | 12/15/20 |
| R340810 | 2  | 19 | 0 | 0.00%   | 38  | 0  | 0.00%  | 12/15/20 |
| R325170 | 6  | 18 | 0 | 0.00%   | 106 | 0  | 0.00%  | 12/16/20 |
| R423642 | 1  | 24 | 1 | 100.00% | 24  | 17 | 70.83% | 12/17/20 |
| R423642 | 1  | 24 | 1 | 100.00% | 24  | 17 | 70.83% | 12/17/20 |
| R423642 | 1  | 24 | 1 | 100.00% | 24  | 17 | 70.83% | 12/17/20 |
| R423642 | 1  | 24 | 1 | 100.00% | 24  | 17 | 70.83% | 12/17/20 |
| R339475 | 5  | 23 | 2 | 40.00%  | 114 | 8  | 7.02%  | 12/19/20 |
| R339475 | 5  | 23 | 2 | 40.00%  | 114 | 8  | 7.02%  | 12/19/20 |
| R325536 | 13 | 23 | 1 | 7.69%   | 300 | 4  | 1.33%  | 1/5/21   |
| R325536 | 13 | 23 | 1 | 7.69%   | 300 | 4  | 1.33%  | 1/5/21   |
| R325302 | 4  | 23 | 1 | 25.00%  | 92  | 4  | 4.35%  | 1/5/21   |
| R325302 | 4  | 23 | 1 | 25.00%  | 92  | 4  | 4.35%  | 1/5/21   |
| R340810 | 1  | 24 | 1 | 100.00% | 24  | 4  | 16.67% | 1/5/21   |
| R340810 | 1  | 24 | 1 | 100.00% | 24  | 4  | 16.67% | 1/5/21   |
| R325131 | 4  | 19 | 1 | 25.00%  | 76  | 2  | 2.63%  | 1/6/21   |
| R325131 | 4  | 19 | 1 | 25.00%  | 76  | 2  | 2.63%  | 1/6/21   |
| R325130 | 12 | 21 | 4 | 33.33%  | 254 | 18 | 7.09%  | 1/7/21   |
| R325130 | 12 | 21 | 4 | 33.33%  | 254 | 18 | 7.09%  | 1/7/21   |
| R325302 | 6  | 17 | 3 | 50.00%  | 104 | 10 | 9.62%  | 1/7/21   |
| R325302 | 6  | 17 | 3 | 50.00%  | 104 | 10 | 9.62%  | 1/7/21   |

|         |    |    |   |        |     |    |       |         |
|---------|----|----|---|--------|-----|----|-------|---------|
| R326848 | 7  | 23 | 1 | 14.29% | 159 | 2  | 1.26% | 1/7/21  |
| R326848 | 7  | 23 | 1 | 14.29% | 159 | 2  | 1.26% | 1/7/21  |
| R325131 | 6  | 21 | 2 | 33.33% | 125 | 8  | 6.40% | 1/8/21  |
| R325131 | 6  | 21 | 2 | 33.33% | 125 | 8  | 6.40% | 1/8/21  |
| R325130 | 3  | 21 | 1 | 33.33% | 64  | 2  | 3.13% | 1/8/21  |
| R325130 | 3  | 21 | 1 | 33.33% | 64  | 2  | 3.13% | 1/8/21  |
| R325536 | 36 | 24 | 8 | 22.22% | 853 | 11 | 1.29% | 1/12/21 |
| R325536 | 36 | 24 | 8 | 22.22% | 853 | 11 | 1.29% | 1/12/21 |
| R325130 | 8  | 23 | 2 | 25.00% | 185 | 3  | 1.62% | 1/12/21 |
| R325130 | 8  | 23 | 2 | 25.00% | 185 | 3  | 1.62% | 1/12/21 |
| R325302 | 5  | 24 | 1 | 20.00% | 119 | 1  | 0.84% | 1/12/21 |
| R325302 | 5  | 24 | 1 | 20.00% | 119 | 1  | 0.84% | 1/12/21 |
| R325131 | 6  | 24 | 3 | 50.00% | 142 | 4  | 2.82% | 1/13/21 |
| R325131 | 6  | 24 | 3 | 50.00% | 142 | 4  | 2.82% | 1/13/21 |
| R339475 | 4  | 19 | 1 | 25.00% | 76  | 1  | 1.32% | 1/13/21 |
| R339475 | 4  | 19 | 1 | 25.00% | 76  | 1  | 1.32% | 1/13/21 |

---
